# Supplementary material
Source: PubMed Central journal article supplement (PMC7294406)
Supplement: zsz314_suppl_supplementary_material.pdf [file zsz314_suppl_supplementary_material.pdf]

## **SUPPLEMENTARY MATERIAL**

### **OBSTRUCTIVE SLEEP APNEA AND CPAP THERAPY ALTER DISTINCT TRANSCRIPTIONAL PROGRAMS IN SUBCUTANEOUS FAT TISSUE**

Sina A. Gharib MD<sup>1,2</sup>, Amanda L. Hurley CNP<sup>3</sup>, Michael J. Rosen MD<sup>4</sup>, James C. Spilsbury  
PhD<sup>5</sup>, Amy E. Schell MD<sup>6,7</sup>, Reena Mehra MD, MS<sup>8</sup>, Sanjay R. Patel MD, MS<sup>9, 10</sup>

<sup>1</sup>Computational Medicine Core, Center for Lung Biology and <sup>2</sup>Division of Pulmonary, Critical Care, and Sleep Medicine, University of Washington, Seattle, WA, USA

<sup>3</sup>Mercer Health, Coldwater, OH, USA

<sup>4</sup>Department of Surgery, Lerner College of Medicine, Cleveland Clinic, Cleveland, OH, USA

<sup>5</sup>Department of Population & Quantitative Health Sciences, School of Medicine, Case Western Reserve University, Cleveland, OH, USA

<sup>6</sup>Department of Otolaryngology and <sup>7</sup>Division of Pulmonary, Critical Care, and Sleep Medicine, Case Western Reserve University/University Hospitals Cleveland Medical Center, Cleveland, OH

<sup>8</sup>Sleep Disorders Center of the Neurologic Institute, Respiratory Institute, Heart and Vascular Institute and Lerner Research Institute, Cleveland Clinic, Cleveland, OH, USA

<sup>9</sup>Center for Sleep and Cardiovascular Outcomes Research, and <sup>10</sup>Division of Pulmonary, Allergy, and Critical Care Medicine, University of Pittsburgh, Pittsburgh PA, USA

**Address correspondence to:**

1. Sina A. Gharib, MD (primary contact author)

Center for Lung Biology

850 Republican St., Box 358052

Seattle, WA 98109

Email: [sagharib@u.washington.edu](mailto:sagharib@u.washington.edu)

Tel: 206-221-0630 Fax: 206-221-0739

2. Sanjay R. Patel, MD, MS

Center for Sleep and Cardiovascular Outcomes Research

3609 Forbes Avenue, 2<sup>nd</sup> Floor

Pittsburgh, PA 15213

Email: [patelsr2@upmc.edu](mailto:patelsr2@upmc.edu)

Tel: 412-383-0607 Fax: 412-692-2888

**Supplementary Table S1. Demographics of Study Group 1 and Study Group 2.**

| <b>Subject ID</b> | <b>Study Group</b> | <b>Description</b>      | <b>Age</b> | <b>Sex</b> | <b>BMI</b> |
|-------------------|--------------------|-------------------------|------------|------------|------------|
| 10-S-N            | 1                  | Normal Subject          | 66         | F          | 31.3       |
| 12-S-N            | 1                  | Normal Subject          | 53         | F          | 35.2       |
| 13-S-N            | 1                  | Normal Subject          | 61         | F          | 41.7       |
| 18-S-N            | 1                  | Normal Subject          | 30         | F          | 40.3       |
| 19-S-N            | 1                  | Normal Subject          | 56         | M          | 42.5       |
| 21-S-N            | 1                  | Normal Subject          | 47         | F          | 26.7       |
| 22-S-N            | 1                  | Normal Subject          | 60         | F          | 33.6       |
| 25-S-N            | 1                  | Normal Subject          | 63         | F          | 30.4       |
| 2-S-A             | 1                  | OSA Subject             | 34         | F          | 50.9       |
| 3-S-A             | 1                  | OSA Subject             | 52         | F          | 28.8       |
| 6-S-A             | 1                  | OSA Subject             | 64         | F          | 32.4       |
| 7-S-A             | 1                  | OSA Subject             | 55         | F          | 32.7       |
| 11-S-A            | 1                  | OSA Subject             | 58         | M          | 35.5       |
| 14-S-A            | 1                  | OSA Subject             | 70         | F          | 39.1       |
| 15-S-A            | 1                  | OSA Subject             | 62         | F          | 20.6       |
| 16-S-A            | 1                  | OSA Subject             | 50         | F          | 39.1       |
| 24-S-A            | 1                  | OSA Subject             | 48         | M          | 50.3       |
| 26-S-A            | 1                  | OSA Subject             | 68         | M          | 32         |
| 5001_before       | 2                  | OSA Subject before CPAP | 69.0       | M          | 32.2       |
| 5001_after        | 2                  | OSA Subject after CPAP  | 69.0       | M          | 31.3       |
| 5002_before       | 2                  | OSA Subject before CPAP | 33.9       | M          | 37.5       |
| 5002_after        | 2                  | OSA Subject after CPAP  | 33.9       | M          | 37.7       |
| 5003_before       | 2                  | OSA Subject before CPAP | 53.9       | M          | 32.2       |
| 5003_after        | 2                  | OSA Subject after CPAP  | 53.9       | M          | 32.3       |
| 5004_before       | 2                  | OSA Subject before CPAP | 51.4       | F          | 43.1       |
| 5004_after        | 2                  | OSA Subject after CPAP  | 51.4       | F          | 41.2       |
| 5006_before       | 2                  | OSA Subject before CPAP | 34.0       | F          | 59.4       |
| 5006_after        | 2                  | OSA Subject after CPAP  | 34.0       | F          | 58.8       |
| 5009_before       | 2                  | OSA Subject before CPAP | 67.2       | M          | 39.8       |
| 5009_after        | 2                  | OSA Subject after CPAP  | 67.2       | M          | 40.3       |
| 5011_before       | 2                  | OSA Subject before CPAP | 51.8       | F          | 37.8       |
| 5011_after        | 2                  | OSA Subject after CPAP  | 51.8       | F          | 37.7       |
| 5012_before       | 2                  | OSA Subject before CPAP | 57.5       | F          | 36.4       |
| 5012_after        | 2                  | OSA Subject after CPAP  | 57.5       | F          | 37.3       |
| 5015_before       | 2                  | OSA Subject before CPAP | 54.1       | M          | 61.0       |
| 5015_after        | 2                  | OSA Subject after CPAP  | 54.1       | M          | 58.5       |
| 5016_before       | 2                  | OSA Subject before CPAP | 47.9       | F          | 41.2       |
| 5016_after        | 2                  | OSA Subject after CPAP  | 47.9       | F          | 41.8       |
| 5017_before       | 2                  | OSA Subject before CPAP | 59.1       | M          | 30.3       |

|             |   |                         |      |   |      |
|-------------|---|-------------------------|------|---|------|
| 5017_after  | 2 | OSA Subject after CPAP  | 59.1 | M | 31.7 |
| 5018_before | 2 | OSA Subject before CPAP | 56.6 | F | 39.1 |
| 5018_after  | 2 | OSA Subject after CPAP  | 56.6 | F | 39.6 |
| 5020_before | 2 | OSA Subject before CPAP | 46.9 | M | 62.5 |
| 5020_after  | 2 | OSA Subject after CPAP  | 46.9 | M | 61.5 |
| 5021_before | 2 | OSA Subject before CPAP | 42.1 | M | 37.5 |
| 5021_after  | 2 | OSA Subject after CPAP  | 42.1 | M | 38.9 |
| 5022_before | 2 | OSA Subject before CPAP | 67.9 | F | 49.2 |
| 5022_after  | 2 | OSA Subject after CPAP  | 67.9 | F | 46.9 |
| 5025_before | 2 | OSA Subject before CPAP | 43.0 | F | 29.3 |
| 5025_after  | 2 | OSA Subject after CPAP  | 43.0 | F | 28.8 |
| 5026_before | 2 | OSA Subject before CPAP | 31.7 | F | 54.1 |
| 5026_after  | 2 | OSA Subject after CPAP  | 31.7 | F | 54.1 |
| 5028_before | 2 | OSA Subject before CPAP | 34.9 | M | 40.2 |
| 5028_after  | 2 | OSA Subject after CPAP  | 34.9 | M | 40.4 |
| 5030_before | 2 | OSA Subject before CPAP | 33.7 | F | 53.8 |
| 5030_after  | 2 | OSA Subject after CPAP  | 33.7 | F | 54.6 |
| 5031_before | 2 | OSA Subject before CPAP | 50.9 | M | 37.4 |
| 5031_after  | 2 | OSA Subject after CPAP  | 50.9 | M | 35.0 |
| 5032_before | 2 | OSA Subject before CPAP | 53.8 | M | 37.8 |
| 5032_after  | 2 | OSA Subject after CPAP  | 53.8 | M | 36.8 |
| 1038_before | 2 | OSA Subject before CPAP | 52.8 | M | 43.5 |
| 1038_after  | 2 | OSA Subject after CPAP  | 52.8 | M | 44.5 |
| 1046_before | 2 | OSA Subject before CPAP | 46.0 | F | 44.0 |
| 1046_after  | 2 | OSA Subject after CPAP  | 46.0 | F | 42.0 |
| 1089_before | 2 | OSA Subject before CPAP | 45.9 | M | 42.3 |
| 1089_after  | 2 | OSA Subject after CPAP  | 45.9 | M | 42.8 |

**Supplementary Table S2. List of up-regulated gene sets (FDR < 0.05) in subcutaneous fat of OSA subjects (Study Group 1).**

| <b>Gene Set Description</b>                                                    | <b>Number of Genes</b> | <b>FDR</b> |
|--------------------------------------------------------------------------------|------------------------|------------|
| HALLMARK_PROTEIN_SECRETION                                                     | 96                     | >0.001     |
| HALLMARK_MYC_TARGETS_V1                                                        | 197                    | >0.001     |
| KEGG_RNA_DEGRADATION                                                           | 58                     | >0.001     |
| KEGG_SPLICEOSOME                                                               | 123                    | >0.001     |
| HALLMARK_MTORC1_SIGNALING                                                      | 197                    | >0.001     |
| REACTOME_MRNA_PROCESSING                                                       | 149                    | >0.001     |
| REACTOME_PROCESSING_OF_CAPPED_INTRON_CONTAINING_PRE_MRNA                       | 131                    | >0.001     |
| REACTOME_HIV_INFECTION                                                         | 184                    | >0.001     |
| REACTOME_HIV_LIFE_CYCLE                                                        | 105                    | >0.001     |
| REACTOME_RNA_POL_II_TRANSCRIPTION                                              | 94                     | >0.001     |
| REACTOME_DEADENYLATION_DEPENDENT_MRNA_DECAY                                    | 43                     | >0.001     |
| REACTOME_CLASS_I_MHC_MEDIATED_ANTIGEN_PROCESSING_PRESENTATION                  | 234                    | >0.001     |
| REACTOME_TRANSPORT_OF_MATURE_TRANSCRIPT_TO_CYTOPLASM                           | 50                     | >0.001     |
| KEGG_UBIQUITIN_MEDIATED_PROTEOLYSIS                                            | 133                    | >0.001     |
| REACTOME_MRNA_SPLICING                                                         | 104                    | >0.001     |
| PID_FAK_PATHWAY                                                                | 58                     | >0.001     |
| PID_PDGFRB_PATHWAY                                                             | 127                    | >0.001     |
| REACTOME_ANTIVIRAL_MECHANISM_BY_IFN_STIMULATED_GENES                           | 63                     | >0.001     |
| PID_ERBB1_DOWNSTREAM_PATHWAY                                                   | 105                    | >0.001     |
| PID_P53_REGULATION_PATHWAY                                                     | 58                     | >0.001     |
| REACTOME_LATE_PHASE_OF_HIV_LIFE_CYCLE                                          | 92                     | >0.001     |
| REACTOME_MRNA_3_END_PROCESSING                                                 | 33                     | >0.001     |
| REACTOME_ANTIGEN_PROCESSING_UBIQUITINATION_PROTEASOME_DEGRADATION              | 198                    | >0.001     |
| REACTOME_CLEAVAGE_OF_GROWING_TRANSCRIPT_IN_THE_TERMINATION_REGION              | 42                     | >0.001     |
| REACTOME_GENERIC_TRANSCRIPTION_PATHWAY                                         | 334                    | >0.001     |
| REACTOME_MAPK_TARGETS_NUCLEAR_EVENTS_MEDIATED_BY_MAP_KINASES                   | 30                     | >0.001     |
| REACTOME_CYTOSOLIC_TRNA_AMINOACYLATION                                         | 24                     | >0.001     |
| HALLMARK_UNFOLDED_PROTEIN_RESPONSE                                             | 111                    | >0.001     |
| HALLMARK_INTERFERON_GAMMA_RESPONSE                                             | 197                    | >0.001     |
| PID_TGFBR_PATHWAY                                                              | 55                     | >0.001     |
| PID_FAS_PATHWAY                                                                | 38                     | >0.001     |
| BIOCARTA_D4GDI_PATHWAY                                                         | 13                     | >0.001     |
| REACTOME_HOST_INTERACTIONS_OF_HIV_FACTORS                                      | 118                    | >0.001     |
| BIOCARTA_RAB_PATHWAY                                                           | 12                     | >0.001     |
| KEGG_COLORECTAL_CANCER                                                         | 62                     | >0.001     |
| REACTOME_DEADENYLATION_OF_MRNA                                                 | 18                     | >0.001     |
| REACTOME_AUTODEGRADATION_OF_CDH1_BY_CDH1_APC_C                                 | 56                     | >0.001     |
| KEGG_PANCREATIC_CANCER                                                         | 70                     | 0.001      |
| REACTOME_TCR_SIGNALING                                                         | 50                     | 0.001      |
| REACTOME_INTERFERON_SIGNALING                                                  | 147                    | 0.001      |
| BIOCARTA_ATRBRCA_PATHWAY                                                       | 20                     | 0.001      |
| PID_ILK_PATHWAY                                                                | 45                     | 0.001      |
| REACTOME_UNFOLDED_PROTEIN_RESPONSE                                             | 73                     | 0.001      |
| PID_RANBP2_PATHWAY                                                             | 11                     | 0.001      |
| BIOCARTA_MET_PATHWAY                                                           | 36                     | 0.001      |
| REACTOME_REGULATION_OF_MRNA_STABILITY_BY_PROTEINS_THAT_BIND_AU_RICH_ELEMENTS   | 80                     | 0.001      |
| REACTOME_REGULATION_OF_ORNITHINE_DECARBOXYLASE_ODC                             | 48                     | 0.001      |
| HALLMARK_ANDROGEN_RESPONSE                                                     | 99                     | 0.001      |
| REACTOME_TRANSPORT_OF_MATURE_MRNA_DERIVED_FROM_AN_INTRONLESS_TRANSCRIPT        | 30                     | 0.001      |
| BIOCARTA_FAS_PATHWAY                                                           | 30                     | 0.001      |
| PID_FOXO_PATHWAY                                                               | 49                     | 0.001      |
| PID_TRAIL_PATHWAY                                                              | 28                     | 0.001      |
| PID_FANCONI_PATHWAY                                                            | 44                     | 0.001      |
| REACTOME_APC_C_CDH1_MEDIATED_DEGRADATION_OF_CDC20_AND_OTHER_APC_C_CDH1_TARGETS | 64                     | 0.001      |
| REACTOME_SIGNALING_BY_WNT                                                      | 62                     | 0.001      |

|                                                                                |     |       |
|--------------------------------------------------------------------------------|-----|-------|
| PID_TELOMERASE_PATHWAY                                                         | 68  | 0.001 |
| HALLMARK_INTERFERON_ALPHA_RESPONSE                                             | 94  | 0.001 |
| HALLMARK_MITOTIC_SPINDLE                                                       | 198 | 0.001 |
| REACTOME_CELL_CYCLE_CHECKPOINTS                                                | 111 | 0.001 |
| REACTOME_DIABETES_PATHWAYS                                                     | 122 | 0.001 |
| KEGG_APOPTOSIS                                                                 | 86  | 0.001 |
| KEGG_PROTEASOME                                                                | 44  | 0.001 |
| PID_NFAT_3PATHWAY                                                              | 53  | 0.001 |
| REACTOME_CELL_CYCLE_MITOTIC                                                    | 303 | 0.001 |
| REACTOME_APC_C_CDC20_MEDIATED_DEGRADATION_OF_MITOTIC_PROTEINS                  | 65  | 0.001 |
| REACTOME_MAP_KINASE_ACTIVATION_IN_TLR_CASCADE                                  | 49  | 0.001 |
| REACTOME_ASPARAGINE_N_LINKED_GLYCOSYLATION                                     | 79  | 0.002 |
| PID_ATM_PATHWAY                                                                | 34  | 0.002 |
| REACTOME_COSTIMULATION_BY_THE_CD28_FAMILY                                      | 61  | 0.002 |
| REACTOME_NOD1_2_SIGNALING_PATHWAY                                              | 28  | 0.002 |
| PID_ERBB1_INTERNALIZATION_PATHWAY                                              | 41  | 0.002 |
| REACTOME_ANTIGEN_PRESENTATION_FOLDING_ASSEMBLY_AND_PEPTIDE_LOADING_OF_CLASS_I  | 20  | 0.002 |
| REACTOME_METABOLISM_OF_NON_CODING_RNA                                          | 45  | 0.002 |
| KEGG_PROTEIN_EXPORT                                                            | 22  | 0.002 |
| REACTOME_NEP_NS2_INTERACTS_WITH_THE_CELLULAR_EXPORT_MACHINERY                  | 25  | 0.002 |
| REACTOME_CDT1_ASSOCIATION_WITH_THE_CDC6_ORC_ORIGIN_COMPLEX                     | 54  | 0.002 |
| REACTOME_ANTIGEN_PROCESSING_CROSS_PRESENTATION                                 | 71  | 0.002 |
| REACTOME_MITOTIC_M_M_G1_PHASES                                                 | 164 | 0.002 |
| REACTOME_REGULATION_OF_MITOTIC_CELL_CYCLE                                      | 77  | 0.003 |
| KEGG_NOD_LIKE_RECEPTOR_SIGNALING_PATHWAY                                       | 60  | 0.003 |
| REACTOME_AUTODEGRADATION_OF_THE_E3_UBIQUITIN_LIGASE_COP1                       | 47  | 0.003 |
| HALLMARK_UV_RESPONSE_DN                                                        | 142 | 0.003 |
| REACTOME_MITOTIC_PROMETAPHASE                                                  | 82  | 0.003 |
| REACTOME_CYTOKINE_SIGNALING_IN_IMMUNE_SYSTEM                                   | 256 | 0.003 |
| HALLMARK_PI3K_AKT_MTOR_SIGNALING                                               | 103 | 0.003 |
| REACTOME_NUCLEOTIDE_BINDING_DOMAIN_LEUCINE_RICH_REPEAT_CONTAINING_RECEPTOR_NLF | 43  | 0.003 |
| BIOCARTA_PROTEASOME_PATHWAY                                                    | 28  | 0.003 |
| PID_BARD1_PATHWAY                                                              | 29  | 0.003 |
| REACTOME_DOWNSTREAM_TCR_SIGNALING                                              | 33  | 0.003 |
| ST_JNK_MAPK_PATHWAY                                                            | 40  | 0.003 |
| REACTOME_GOLGI_ASSOCIATED_VESICLE_BIOGENESIS                                   | 49  | 0.003 |
| REACTOME_CROSS_PRESENTATION_OF_SOLUBLE_EXOGENOUS_ANTIGENS_ENDOSOMES            | 46  | 0.003 |
| REACTOME_NUCLEAR_EVENTS_KINASE_AND_TRANSCRIPTION_FACTOR_ACTIVATION             | 24  | 0.003 |
| REACTOME_TRANS_GOLGI_NETWORK_VESICLE_BUDDING                                   | 56  | 0.003 |
| REACTOME_SIGNALING_BY_TGF_BETA_RECEPTOR_COMPLEX                                | 60  | 0.003 |
| REACTOME_TRANSPORT_OF_RIBONUCLEOPROTEINS_INTO_THE_HOST_NUCLEUS                 | 25  | 0.003 |
| REACTOME_PYRUVATE_METABOLISM                                                   | 18  | 0.003 |
| HALLMARK_E2F_TARGETS                                                           | 199 | 0.003 |
| BIOCARTA_CASPASE_PATHWAY                                                       | 23  | 0.003 |
| BIOCARTA_TFF_PATHWAY                                                           | 21  | 0.003 |
| BIOCARTA_CDC42RAC_PATHWAY                                                      | 16  | 0.003 |
| REACTOME_ORC1_REMOVAL_FROM_CHROMATIN                                           | 65  | 0.003 |
| REACTOME_TGF_BETA_RECEPTOR_SIGNALING_ACTIVATES_SMADS                           | 24  | 0.003 |
| REACTOME_ASSEMBLY_OF_THE_PRE_REPLICATIVE_COMPLEX                               | 63  | 0.003 |
| PID_CDC42_PATHWAY                                                              | 70  | 0.003 |
| REACTOME_NEGATIVE_REGULATORS_OF_RIG_I_MDA5_SIGNALING                           | 30  | 0.003 |
| REACTOME_MEMBRANE_TRAFFICKING                                                  | 122 | 0.003 |
| REACTOME_TRNA_AMINOACYLATION                                                   | 42  | 0.003 |
| REACTOME_PROCESSING_OF_INTRONLESS_PRE_MRNAS                                    | 14  | 0.003 |
| BIOCARTA_RAS_PATHWAY                                                           | 23  | 0.003 |
| ST_INTEGRIN_SIGNALING_PATHWAY                                                  | 81  | 0.004 |
| KEGG_GLYCOSYLPHOSPHATIDYLINOSITOL_GPI_ANCHOR_BIOSYNTHESIS                      | 25  | 0.004 |

|                                                                                 |     |       |
|---------------------------------------------------------------------------------|-----|-------|
| REACTOME_DESTABILIZATION_OF_MRNA_BY_AUF1_HNRNP_D0                               | 50  | 0.004 |
| REACTOME_SIGNALING_BY_HIPPO                                                     | 19  | 0.004 |
| REACTOME_CONVERSION_FROM_APC_C_CDC20_TO_APC_C_CDH1_IN_LATE_ANAPHASE             | 16  | 0.004 |
| REACTOME_PROCESSING_OF_CAPPED_INTRONLESS_PRE_MRNA                               | 23  | 0.004 |
| REACTOME_DNA_REPLICATION                                                        | 184 | 0.004 |
| REACTOME_SCF_BETA_TRCP_MEDIATED_DEGRADATION_OF_EMI1                             | 49  | 0.004 |
| BIOCARTA_FCER1_PATHWAY                                                          | 38  | 0.004 |
| PID_VEGFR1_PATHWAY                                                              | 26  | 0.004 |
| BIOCARTA_ACTINY_PATHWAY                                                         | 20  | 0.005 |
| PID_P38_ALPHA_BETA_PATHWAY                                                      | 31  | 0.005 |
| REACTOME_CALNEXIN_CALRETICULIN_CYCLE                                            | 11  | 0.005 |
| REACTOME_PERK_REGULATED_GENE_EXPRESSION                                         | 26  | 0.005 |
| BIOCARTA_TNFR1_PATHWAY                                                          | 29  | 0.005 |
| HALLMARK_ADIPOGENESIS                                                           | 194 | 0.005 |
| REACTOME_REGULATION_OF_APOPTOSIS                                                | 56  | 0.005 |
| PID_TCPTP_PATHWAY                                                               | 41  | 0.005 |
| REACTOME_ER_PHAGOSOME_PATHWAY                                                   | 58  | 0.005 |
| REACTOME_RNA_POL_II_PRE_TRANSCRIPTION_EVENTS                                    | 52  | 0.005 |
| KEGG_NON_HOMOLOGOUS_END_JOINING                                                 | 13  | 0.005 |
| REACTOME_JNK_C_JUN_KINASES_PHOSPHORYLATION_AND_ACTIVATION_MEDIATED_BY_ACTIVATED | 16  | 0.006 |
| REACTOME_APOPTOSIS                                                              | 142 | 0.006 |
| PID_TNF_PATHWAY                                                                 | 46  | 0.006 |
| REACTOME_ACTIVATION_OF_NF_KAPPAB_IN_B_CELLS                                     | 61  | 0.006 |
| PID_ANGIOPOIETIN_RECEPTOR_PATHWAY                                               | 50  | 0.006 |
| REACTOME_NFKB_AND_MAP_KINASES_ACTIVATION_MEDIATED_BY_TLR4_SIGNALING_REPERTOIRE  | 69  | 0.006 |
| BIOCARTA_P38MAPK_PATHWAY                                                        | 39  | 0.006 |
| BIOCARTA_IGF1_PATHWAY                                                           | 21  | 0.006 |
| REACTOME_DOWNREGULATION_OF_TGF_BETA_RECEPTOR_SIGNALING                          | 21  | 0.006 |
| REACTOME_CDK_MEDIATED_PHOSPHORYLATION_AND_REMOVAL_OF_CDC6                       | 46  | 0.007 |
| BIOCARTA_HIVNEF_PATHWAY                                                         | 57  | 0.007 |
| PID_IFNG_PATHWAY                                                                | 40  | 0.007 |
| PID_VEGFR1_2_PATHWAY                                                            | 67  | 0.007 |
| KEGG_N_GLYCAN_BIOSYNTHESIS                                                      | 45  | 0.007 |
| PID_ECADHERIN_NASCENT_AJ_PATHWAY                                                | 39  | 0.007 |
| REACTOME_CELL_CYCLE                                                             | 391 | 0.007 |
| BIOCARTA_SALMONELLA_PATHWAY                                                     | 13  | 0.007 |
| PID_CXCR4_PATHWAY                                                               | 101 | 0.007 |
| REACTOME_METABOLISM_OF_RNA                                                      | 251 | 0.007 |
| REACTOME_TRANSCRIPTIONAL_ACTIVITY_OF_SMAD2_SMAD3_SMAD4_HETEROTRIMER             | 36  | 0.007 |
| REACTOME_ASSOCIATION_OF_TRIC_CCT_WITH_TARGET_PROTEINS_DURING_BIOSYNTHESIS       | 26  | 0.007 |
| REACTOME_VIF_MEDIATED_DEGRADATION_OF_APOBEC3G                                   | 49  | 0.007 |
| REACTOME_DOWNSTREAM_SIGNALING_EVENTS_OF_B_CELL_RECEPTOR_BCR                     | 92  | 0.007 |
| REACTOME_ERK_MAPK_TARGETS                                                       | 21  | 0.007 |
| PID_WNT_NONCANONICAL_PATHWAY                                                    | 32  | 0.007 |
| REACTOME_INTERACTIONS_OF_VPR_WITH_HOST_CELLULAR_PROTEINS                        | 30  | 0.007 |
| REACTOME_N_GLYCAN_TRIMMING_IN_THE_ER_AND_CALNEXIN_CALRETICULIN_CYCLE            | 13  | 0.008 |
| REACTOME_TRIF_MEDIATED_TLR3_SIGNALING                                           | 72  | 0.008 |
| REACTOME_ACTIVATED_TLR4_SIGNALLING                                              | 89  | 0.008 |
| REACTOME_GENERATION_OF_SECOND_MESSENGER_MOLECULES                               | 26  | 0.008 |
| REACTOME_PROTEIN_FOLDING                                                        | 50  | 0.008 |
| KEGG_AMINOACYL_TRNA_BIOSYNTHESIS                                                | 41  | 0.008 |
| REACTOME_ENERGY_DEPENDENT_REGULATION_OF_MTOR_BY_LKB1_AMPK                       | 16  | 0.008 |
| REACTOME_TOLL_RECEPTOR_CASCADES                                                 | 109 | 0.009 |
| REACTOME_INTEGRATION_OF_PROVIRUS                                                | 8   | 0.009 |
| REACTOME_P53_DEPENDENT_G1_DNA_DAMAGE_RESPONSE                                   | 53  | 0.009 |
| BIOCARTA_PDGF_PATHWAY                                                           | 32  | 0.009 |
| REACTOME_TRANSCRIPTION                                                          | 189 | 0.009 |

|                                                                                 |     |       |
|---------------------------------------------------------------------------------|-----|-------|
| PID_HDAC_CLASSII_PATHWAY                                                        | 34  | 0.009 |
| PID_ERBB2_ERBB3_PATHWAY                                                         | 44  | 0.009 |
| PID_ERBB1_RECEPTOR_PROXIMAL_PATHWAY                                             | 35  | 0.009 |
| BIOCARTA_AT1R_PATHWAY                                                           | 32  | 0.009 |
| REACTOME_P53_INDEPENDENT_G1_S_DNA_DAMAGE_CHECKPOINT                             | 48  | 0.009 |
| REACTOME_INHIBITION_OF_THE_PROTEOLYTIC_ACTIVITY_OF_APC_C_REQUIRED_FOR_THE_ONSET | 18  | 0.01  |
| KEGG_BASAL_TRANSCRIPTION_FACTORS                                                | 32  | 0.01  |
| KEGG_RENAL_CELL_CARCINOMA                                                       | 70  | 0.01  |
| REACTOME_TIE2_SIGNALING                                                         | 17  | 0.011 |
| BIOCARTA_INSULIN_PATHWAY                                                        | 21  | 0.011 |
| HALLMARK_COMPLEMENT                                                             | 195 | 0.011 |
| REACTOME_SYNTHESIS_OF_DNA                                                       | 90  | 0.011 |
| REACTOME_MYD88_MAL_CASCADE_INITIATED_ON_PLASMA_MEMBRANE                         | 80  | 0.012 |
| PID_IL6_7_PATHWAY                                                               | 47  | 0.012 |
| PID_LYMPH_ANGIOGENESIS_PATHWAY                                                  | 24  | 0.012 |
| PID_RAC1_PATHWAY                                                                | 54  | 0.012 |
| BIOCARTA_IL6_PATHWAY                                                            | 22  | 0.012 |
| REACTOME_REGULATION_OF_PYRUVATE_DEHYDROGENASE_PDH_COMPLEX                       | 12  | 0.012 |
| REACTOME_INTERFERON_GAMMA_SIGNALING                                             | 58  | 0.013 |
| BIOCARTA_CHREBP2_PATHWAY                                                        | 41  | 0.013 |
| REACTOME_ACTIVATION_OF_GENES_BY_ATF4                                            | 23  | 0.013 |
| REACTOME_DOUBLE_STRAND_BREAK_REPAIR                                             | 22  | 0.013 |
| BIOCARTA_RARRXR_PATHWAY                                                         | 15  | 0.013 |
| REACTOME_POST_TRANSLATIONAL_MODIFICATION_SYNTHESIS_OF_GPI_ANCHORED_PROTEINS     | 26  | 0.013 |
| BIOCARTA_TEL_PATHWAY                                                            | 18  | 0.014 |
| REACTOME_SIGNALING_BY_THE_B_CELL_RECEPTOR_BCR                                   | 121 | 0.014 |
| PID_ATF2_PATHWAY                                                                | 56  | 0.014 |
| REACTOME_LOSS_OF_NLP_FROM_MITOTIC_CENTROSOMES                                   | 55  | 0.014 |
| PID_FCER1_PATHWAY                                                               | 61  | 0.014 |
| REACTOME_ACTIVATION_OF_THE_AP1_FAMILY_OF_TRANSCRIPTION_FACTORS                  | 10  | 0.015 |
| PID_BCR_5PATHWAY                                                                | 65  | 0.015 |
| REACTOME_REGULATION_OF_AMPK_ACTIVITY_VIA_LKB1                                   | 13  | 0.015 |
| REACTOME_ACTIVATION_OF_CHAPERONES_BY_ATF6_ALPHA                                 | 11  | 0.015 |
| REACTOME_DESTABILIZATION_OF_MRNA_BY_TRISTETRAPROLIN_TTP                         | 17  | 0.015 |
| REACTOME_RECRUITMENT_OF_MITOTIC_CENTROSOME_PROTEINS_AND_COMPLEXES               | 62  | 0.016 |
| BIOCARTA_NGF_PATHWAY                                                            | 18  | 0.016 |
| PID_IL12_STAT4_PATHWAY                                                          | 33  | 0.016 |
| BIOCARTA_EIF2_PATHWAY                                                           | 11  | 0.016 |
| REACTOME_MITOTIC_G1_G1_S_PHASES                                                 | 130 | 0.017 |
| HALLMARK_G2M_CHECKPOINT                                                         | 199 | 0.017 |
| REACTOME_PHOSPHORYLATION_OF_CD3_AND_TCR_ZETA_CHAINS                             | 15  | 0.017 |
| ST_PHOSPHOINOSITIDE_3_KINASE_PATHWAY                                            | 37  | 0.017 |
| BIOCARTA_MAPK_PATHWAY                                                           | 86  | 0.018 |
| HALLMARK_APOPTOSIS                                                              | 157 | 0.018 |
| REACTOME_MHC_CLASS_II_ANTIGEN_PRESENTATION                                      | 87  | 0.018 |
| PID_IL1_PATHWAY                                                                 | 33  | 0.018 |
| PID_S1P_S1P2_PATHWAY                                                            | 24  | 0.018 |
| PID_MTOR_4PATHWAY                                                               | 69  | 0.018 |
| KEGG_T_CELL_RECEPTOR_SIGNALING_PATHWAY                                          | 106 | 0.018 |
| BIOCARTA_TGFB_PATHWAY                                                           | 19  | 0.018 |
| KEGG_NEUROTROPHIN_SIGNALING_PATHWAY                                             | 126 | 0.018 |
| BIOCARTA_EGF_PATHWAY                                                            | 31  | 0.018 |
| REACTOME_INSULIN_SYNTHESIS_AND_PROCESSING                                       | 18  | 0.018 |
| REACTOME_G1_S_TRANSITION                                                        | 106 | 0.018 |
| PID_CASPASE_PATHWAY                                                             | 51  | 0.018 |
| REACTOME_M_G1_TRANSITION                                                        | 78  | 0.018 |
| REACTOME_PD1_SIGNALING                                                          | 17  | 0.019 |



|                                                                               |     |       |
|-------------------------------------------------------------------------------|-----|-------|
| REACTOME_EARLY_PHASE_OF_HIV_LIFE_CYCLE                                        | 13  | 0.019 |
| PID_MAPK_TRK_PATHWAY                                                          | 34  | 0.019 |
| BIOCARTA_GLEEVEC_PATHWAY                                                      | 23  | 0.019 |
| REACTOME_DARPP_32_EVENTS                                                      | 24  | 0.019 |
| PID_MYC_ACTIV_PATHWAY                                                         | 76  | 0.019 |
| REACTOME_CTLA4_INHIBITORY_SIGNALING                                           | 21  | 0.019 |
| KEGG_PROGESTERONE_MEDIATED_OOCYTE_MATURATION                                  | 84  | 0.02  |
| PID_CXCR3_PATHWAY                                                             | 43  | 0.02  |
| REACTOME_MRNA_DECAY_BY_5_TO_3_EXORIBONUCLEASE                                 | 14  | 0.02  |
| REACTOME_PHOSPHORYLATION_OF_THE_APC_C                                         | 17  | 0.02  |
| PID_HEDGEHOG_GLI_PATHWAY                                                      | 48  | 0.02  |
| PID_INSULIN_PATHWAY                                                           | 43  | 0.02  |
| REACTOME_TRANSPORT_TO_THE_GOLGI_AND_SUBSEQUENT_MODIFICATION                   | 33  | 0.02  |
| PID_TCR_PATHWAY                                                               | 66  | 0.02  |
| REACTOME_SIGNALING_BY_ILS                                                     | 105 | 0.02  |
| PID_DNA_PK_PATHWAY                                                            | 16  | 0.02  |
| REACTOME_TRAF6_MEDIATED_INDUCTION_OF_NFKB_AND_MAP_KINASES_UPON_TLR7_8_OR_9_AC | 74  | 0.02  |
| REACTOME_PKB_MEDIATED_EVENTS                                                  | 27  | 0.021 |
| BIOCARTA_TCR_PATHWAY                                                          | 44  | 0.022 |
| REACTOME_DESTABILIZATION_OF_MRNA_BY_KSRP                                      | 17  | 0.022 |
| BIOCARTA_BAD_PATHWAY                                                          | 26  | 0.023 |
| BIOCARTA_NFAT_PATHWAY                                                         | 53  | 0.023 |
| REACTOME_INHIBITION_OF_REPLICATION_INITIATION_OF_DAMAGED_DNA_BY_RB1_E2F1      | 12  | 0.023 |
| KEGG_ENDOCYTOSIS                                                              | 176 | 0.023 |
| REACTOME_RNA_POL_I_TRANSCRIPTION_INITIATION                                   | 22  | 0.023 |
| REACTOME_S_PHASE                                                              | 106 | 0.023 |
| KEGG_CELL_CYCLE                                                               | 123 | 0.023 |
| BIOCARTA_GPCR_PATHWAY                                                         | 34  | 0.023 |
| REACTOME_RNA_POL_II_TRANSCRIPTION_PRE_INITIATION_AND_PROMOTER_OPENING         | 37  | 0.023 |
| PID_AVB3_OPN_PATHWAY                                                          | 31  | 0.023 |
| KEGG_EPITHELIAL_CELL_SIGNALING_IN_HELICOBACTER_PYLORI_INFECTION               | 67  | 0.024 |
| KEGG_PATHOGENIC_ESCHERICHIA_COLI_INFECTION                                    | 55  | 0.024 |
| REACTOME_MITOTIC_G2_G2_M_PHASES                                               | 77  | 0.024 |
| REACTOME_ERKS_ARE_INACTIVATED                                                 | 12  | 0.025 |
| PID_ARF6_TRAFFICKING_PATHWAY                                                  | 46  | 0.025 |
| PID_EPHB_FWD_PATHWAY                                                          | 40  | 0.025 |
| BIOCARTA_CERAMIDE_PATHWAY                                                     | 22  | 0.025 |
| REACTOME_COPI_MEDIATED_TRANSPORT                                              | 9   | 0.025 |
| KEGG_CHRONIC_MYELOID_LEUKEMIA                                                 | 73  | 0.025 |
| KEGG_MTOR_SIGNALING_PATHWAY                                                   | 50  | 0.025 |
| ST_DIFFERENTIATION_PATHWAY_IN_PC12_CELLS                                      | 45  | 0.025 |
| BIOCARTA_RHO_PATHWAY                                                          | 32  | 0.025 |
| BIOCARTA_LEPTIN_PATHWAY                                                       | 10  | 0.026 |
| SIG_REGULATION_OF_THE_ACTIN_CYTOSKELETON_BY_RHO_GTPASES                       | 35  | 0.026 |
| REACTOME_APC_CDC20_MEDIATED_DEGRADATION_OF_NEK2A                              | 21  | 0.026 |
| REACTOME_DNA_REPAIR                                                           | 101 | 0.027 |
| KEGG_OOCYTE_MEIOSIS                                                           | 110 | 0.027 |
| REACTOME_TRANSLOCATION_OF_ZAP_70_TO_IMMUNOLOGICAL_SYNAPSE                     | 13  | 0.027 |
| KEGG_SNARE_INTERACTIONS_IN_VESICULAR_TRANSPORT                                | 38  | 0.027 |
| REACTOME_ACTIVATION_OF_CHAPERONE_GENES_BY_ATF6_ALPHA                          | 9   | 0.027 |
| REACTOME_METABOLISM_OF_MRNA                                                   | 209 | 0.027 |
| REACTOME_PYRUVATE_METABOLISM_AND_CITRIC_ACID_TCA_CYCLE                        | 40  | 0.027 |
| PID_MET_PATHWAY                                                               | 80  | 0.028 |
| BIOCARTA_MTOR_PATHWAY                                                         | 23  | 0.028 |
| PID_AR_PATHWAY                                                                | 60  | 0.028 |
| REACTOME_CTNNB1_PHOSPHORYLATION_CASCADE                                       | 15  | 0.029 |
| KEGG_VIRAL_MYOCARDITIS                                                        | 68  | 0.029 |

|                                                                               |     |       |
|-------------------------------------------------------------------------------|-----|-------|
| REACTOME_HORMONE_SENSITIVE_LIPASE_HSL_MEDIATED_TRIACYLGLYCEROL_HYDROLYSIS     | 12  | 0.029 |
| PID_NFKAPPAB_CANONICAL_PATHWAY                                                | 23  | 0.029 |
| REACTOME_DESTABILIZATION_OF_MRNA_BY_BRF1                                      | 17  | 0.029 |
| REACTOME_REGULATION_OF_GLUKOKINASE_BY_GLUKOKINASE_REGULATORY_PROTEIN          | 25  | 0.029 |
| BIOCARTA_EIF4_PATHWAY                                                         | 24  | 0.029 |
| REACTOME_CELL_EXTRACELLULAR_MATRIX_INTERACTIONS                               | 14  | 0.029 |
| BIOCARTA_HDAC_PATHWAY                                                         | 27  | 0.03  |
| PID_TCR_JNK_PATHWAY                                                           | 14  | 0.03  |
| KEGG_LEISHMANIA_INFECTIOIN                                                    | 68  | 0.031 |
| PID_HDAC_CLASSI_PATHWAY                                                       | 66  | 0.031 |
| REACTOME_SIGNALING_BY_ROBO_RECEPTOR                                           | 29  | 0.032 |
| SIG_CHEMOTAXIS                                                                | 45  | 0.032 |
| REACTOME_RAP1_SIGNALLING                                                      | 15  | 0.032 |
| REACTOME_CD28_CO_STIMULATION                                                  | 31  | 0.032 |
| BIOCARTA_HCMV_PATHWAY                                                         | 17  | 0.032 |
| PID_SMAD2_3PATHWAY                                                            | 17  | 0.033 |
| BIOCARTA_ECM_PATHWAY                                                          | 23  | 0.033 |
| PID_PDGFR_A_PATHWAY                                                           | 22  | 0.033 |
| REACTOME_INTRINSIC_PATHWAY_FOR_APOPTOSIS                                      | 29  | 0.033 |
| KEGG_FOCAL_ADHESION                                                           | 198 | 0.035 |
| REACTOME_CELL_SURFACE_INTERACTIONS_AT_THE_VASCULAR_WALL                       | 83  | 0.035 |
| KEGG_TOLL_LIKE_RECEPTOR_SIGNALING_PATHWAY                                     | 97  | 0.035 |
| BIOCARTA_NDKDYNAMIN_PATHWAY                                                   | 17  | 0.035 |
| REACTOME_PI_METABOLISM                                                        | 47  | 0.035 |
| REACTOME_NGF_SIGNALLING_VIA_TRKA_FROM_THE_PLASMA_MEMBRANE                     | 133 | 0.035 |
| BIOCARTA_PML_PATHWAY                                                          | 17  | 0.035 |
| PID_CD40_PATHWAY                                                              | 30  | 0.035 |
| REACTOME_SIGNALING_BY_INSULIN_RECEPTOR                                        | 103 | 0.035 |
| KEGG_MAPK_SIGNALING_PATHWAY                                                   | 263 | 0.035 |
| PID_IL2_1PATHWAY                                                              | 55  | 0.036 |
| PID_AR_TF_PATHWAY                                                             | 53  | 0.036 |
| REACTOME_IKK_COMPLEX_RECRUITMENT_MEDIATED_BY_RIP1                             | 9   | 0.037 |
| BIOCARTA_MEF2D_PATHWAY                                                        | 18  | 0.038 |
| HALLMARK_ALLOGRAFT_REJECTION                                                  | 196 | 0.039 |
| PID_PI3KC_I_AKT_PATHWAY                                                       | 35  | 0.038 |
| HALLMARK_HEME_METABOLISM                                                      | 195 | 0.039 |
| PID_ERBB4_PATHWAY                                                             | 38  | 0.039 |
| ST_TUMOR_NECROSIS_FACTOR_PATHWAY                                              | 29  | 0.04  |
| REACTOME_INSULIN_RECEPTOR_SIGNALLING_CASCADE                                  | 82  | 0.039 |
| REACTOME_NFKB_ACTIVATION_THROUGH_FADD_RIP1_PATHWAY_MEDIATED_BY_CASPASE_8_AND1 | 12  | 0.039 |
| REACTOME_EXTRINSIC_PATHWAY_FOR_APOPTOSIS                                      | 13  | 0.04  |
| PID_ALK1_PATHWAY                                                              | 26  | 0.041 |
| ST_Granule_Cell_Survival_Pathway                                              | 27  | 0.043 |
| BIOCARTA_HIF_PATHWAY                                                          | 15  | 0.043 |
| BIOCARTA_DNAFRAGMENT_PATHWAY                                                  | 10  | 0.043 |
| REACTOME_FORMATION_OF_RNA_POL_II_ELONGATION_COMPLEX_                          | 37  | 0.043 |
| REACTOME_VEGF_LIGAND_RECEPTOR_INTERACTIONS                                    | 10  | 0.043 |
| KEGG_ADHERENS_JUNCTION                                                        | 73  | 0.043 |
| REACTOME_RNA_POL_I_TRANSCRIPTION_TERMINATION                                  | 19  | 0.043 |
| PID_P75_NTR_PATHWAY                                                           | 69  | 0.043 |
| BIOCARTA_AKAP95_PATHWAY                                                       | 12  | 0.043 |
| REACTOME_CYCLIN_E_ASSOCIATED_EVENTS_DURING_G1_S_TRANSITION_                   | 62  | 0.043 |
| BIOCARTA_CREB_PATHWAY                                                         | 27  | 0.043 |
| REACTOME_NOTCH_HLH_TRANSCRIPTION_PATHWAY                                      | 12  | 0.044 |
| REACTOME_SMAD2_SMAD3_SMAD4_HETEROTRIMER_REGULATES_TRANSCRIPTION               | 25  | 0.044 |
| REACTOME_SYNTHESIS_OF_PIP2_AT_THE_LATE_ENDOSOME_MEMBRANE                      | 10  | 0.045 |
| REACTOME_SCF5KIP2_MEDIATED_DEGRADATION_OF_P27_P21                             | 53  | 0.045 |

|                                                                 |    |       |
|-----------------------------------------------------------------|----|-------|
| BIOCARTA_GSK3_PATHWAY                                           | 27 | 0.045 |
| PID_ATR_PATHWAY                                                 | 39 | 0.045 |
| REACTOME_SYNTHESIS_OF_PIPS_AT_THE_EARLY_ENDOSOME_MEMBRANE       | 12 | 0.045 |
| BIOCARTA_CTLA4_PATHWAY                                          | 19 | 0.045 |
| BIOCARTA_MITOCHONDRIA_PATHWAY                                   | 21 | 0.046 |
| KEGG_VASOPRESSIN_REGULATED_WATER_REABSORPTION                   | 44 | 0.047 |
| REACTOME_E2F_MEDIATED_REGULATION_OF_DNA_REPLICATION             | 33 | 0.047 |
| REACTOME_FORMATION_OF_TUBULIN_FOLDING_INTERMEDIATES_BY_CCT_TRIC | 20 | 0.047 |
| KEGG_TGF_BETA_SIGNALING_PATHWAY                                 | 84 | 0.047 |
| PID_NEPHRIN_NEPH1_PATHWAY                                       | 31 | 0.047 |
| PID_CERAMIDE_PATHWAY                                            | 48 | 0.047 |
| REACTOME_PEROXISOMAL_LIPID_METABOLISM                           | 20 | 0.047 |
| PID_IL8_CXCR2_PATHWAY                                           | 33 | 0.048 |
| PID_REELIN_PATHWAY                                              | 29 | 0.048 |
| REACTOME_ACTIVATION_OF_CHAPERONE_GENES_BY_XBP1S                 | 42 | 0.048 |
| BIOCARTA_AKAP13_PATHWAY                                         | 12 | 0.049 |
| PID_ER_NONGENOMIC_PATHWAY                                       | 41 | 0.049 |
| PID_THROMBIN_PAR4_PATHWAY                                       | 15 | 0.049 |
| REACTOME_ENDOSOMAL_SORTING_COMPLEX_REQUIRED_FOR_TRANSPORT_ESCRT | 26 | 0.049 |
| REACTOME_PI3K_CASCADE                                           | 66 | 0.049 |
| PID_GMCSF_PATHWAY                                               | 37 | 0.049 |

**Supplementary Table S3. List of down-regulated gene sets (FDR < 0.05) in subcutaneous fat of OSA subjects (Study Group 1).**

| <b>Gene Set Description</b>                                   | <b>Number of Genes</b> | <b>FDR</b> |
|---------------------------------------------------------------|------------------------|------------|
| REACTOME_OLFACTORY_SIGNALING_PATHWAY                          | 315                    | >0.001     |
| KEGG_OLFACTORY_TRANSDUCTION                                   | 376                    | >0.001     |
| REACTOME_BETA_DEFENSINS                                       | 34                     | >0.001     |
| REACTOME_DEFENSINS                                            | 41                     | >0.001     |
| PID_CONE_PATHWAY                                              | 23                     | 0.001      |
| KEGG_NEUROACTIVE_LIGAND_RECEPTOR_INTERACTION                  | 265                    | 0.009      |
| HALLMARK_KRAS_SIGNALING_DN                                    | 192                    | 0.008      |
| KEGG_METABOLISM_OF_XENOBIOTICS_BY_CYTOCHROME_P450             | 60                     | 0.008      |
| KEGG_RETINOL_METABOLISM                                       | 53                     | 0.008      |
| PID_RHODOPSIN_PATHWAY                                         | 24                     | 0.016      |
| KEGG_DRUG_METABOLISM_OTHER_ENZYMES                            | 41                     | 0.016      |
| REACTOME_CLASS_C_3_METABOTROPIC_Glutamate_Pheromone_Receptors | 13                     | 0.015      |
| REACTOME_AMINE_LIGAND_BINDING_RECEPTORS                       | 37                     | 0.015      |
| REACTOME_GPCR_LIGAND_BINDING                                  | 375                    | 0.02       |
| REACTOME_RECYCLING_OF_BILE_ACIDS_AND_SALTS                    | 11                     | 0.021      |
| REACTOME_TIGHT_JUNCTION_INTERACTIONS                          | 28                     | 0.024      |
| BIOCARTA_CYTOKINE_PATHWAY                                     | 19                     | 0.031      |
| REACTOME_COMMON_PATHWAY                                       | 14                     | 0.03       |
| REACTOME_STRIATED_MUSCLE_CONTRACTION                          | 27                     | 0.035      |
| REACTOME_CLASS_A1_RHODOPSIN_LIKE_RECEPTORS                    | 280                    | 0.038      |
| KEGG_DRUG_METABOLISM_CYTOCHROME_P450                          | 62                     | 0.042      |
| REACTOME_PEPTIDE_CHAIN_ELONGATION                             | 86                     | 0.048      |

**Supplementary Table S4. List of Adipogenesis-associated genes up-regulated in subcutaneous fat of OSA subjects (Study Group 1).**

| <b>Gene Symbol</b> | <b>Gene Name</b>                                                            |
|--------------------|-----------------------------------------------------------------------------|
| MAP4K3             | mitogen-activated protein kinase kinase kinase kinase 3(MAP4K3)             |
| ENPP2              | ectonucleotide pyrophosphatase/phosphodiesterase 2(ENPP2)                   |
| CMPK1              | cytidine/uridine monophosphate kinase 1(CMPK1)                              |
| TOB1               | transducer of ERBB2, 1(TOB1)                                                |
| ATL2               | atlastin GTPase 2(ATL2)                                                     |
| NKIRAS1            | NFKB inhibitor interacting Ras like 1(NKIRAS1)                              |
| NDUFA5             | NADH:ubiquinone oxidoreductase subunit A5(NDUFA5)                           |
| RIOK3              | RIO kinase 3(RIOK3)                                                         |
| IFNGR1             | interferon gamma receptor 1(IFNGR1)                                         |
| CHUK               | conserved helix-loop-helix ubiquitous kinase(CHUK)                          |
| PDCD4              | programmed cell death 4 (neoplastic transformation inhibitor)(PDCD4)        |
| DBT                | dihydroipoamide branched chain transacylase E2(DBT)                         |
| TANK               | TRAF family member associated NFKB activator(TANK)                          |
| DNAJC15            | DnaJ heat shock protein family (Hsp40) member C15(DNAJC15)                  |
| NMT1               | N-myristoyltransferase 1(NMT1)                                              |
| HIBCH              | 3-hydroxyisobutyryl-CoA hydrolase(HIBCH)                                    |
| HSPB8              | heat shock protein family B (small) member 8(HSPB8)                         |
| CD36               | CD36 molecule(CD36)                                                         |
| DHRS7              | dehydrogenase/reductase 7(DHRS7)                                            |
| IDH3A              | isocitrate dehydrogenase 3 (NAD(+)) alpha(IDH3A)                            |
| SORBS1             | sorbin and SH3 domain containing 1(SORBS1)                                  |
| SPARCL1            | SPARC like 1(SPARCL1)                                                       |
| ACADM              | acyl-CoA dehydrogenase, C-4 to C-12 straight chain(ACADM)                   |
| MTCH2              | mitochondrial carrier 2(MTCH2)                                              |
| PRDX3              | peroxiredoxin 3(PRDX3)                                                      |
| PTCD3              | pentatricopeptide repeat domain 3(PTCD3)                                    |
| GBE1               | 1,4-alpha-glucan branching enzyme 1(GBE1)                                   |
| ME1                | malic enzyme 1(ME1)                                                         |
| ANGPT1             | angiopoietin 1(ANGPT1)                                                      |
| UCP2               | uncoupling protein 2(UCP2)                                                  |
| RETSAT             | retinol saturase(RETSAT)                                                    |
| DRAM2              | DNA damage regulated autophagy modulator 2(DRAM2)                           |
| DLD                | dihydroipoamide dehydrogenase(DLD)                                          |
| G3BP2              | G3BP stress granule assembly factor 2(G3BP2)                                |
| RNF11              | ring finger protein 11(RNF11)                                               |
| AIFM1              | apoptosis inducing factor, mitochondria associated 1(AIFM1)                 |
| MYLK               | myosin light chain kinase(MYLK)                                             |
| SOD1               | superoxide dismutase 1, soluble(SOD1)                                       |
| PLIN2              | perilipin 2(PLIN2)                                                          |
| PPM1B              | protein phosphatase, Mg <sup>2+</sup> /Mn <sup>2+</sup> dependent 1B(PPM1B) |
| LEP                | leptin(LEP)                                                                 |
| PQLC3              | PQ loop repeat containing 3(PQLC3)                                          |
| CCNG2              | cyclin G2(CCNG2)                                                            |
| ITIH5              | inter-alpha-trypsin inhibitor heavy chain family member 5(ITIH5)            |
| LIFR               | leukemia inhibitory factor receptor alpha(LIFR)                             |

|          |                                                                            |
|----------|----------------------------------------------------------------------------|
| UBQLN1   | ubiquilin 1(UBQLN1)                                                        |
| EPHX2    | epoxide hydrolase 2(EPHX2)                                                 |
| GPAM     | glycerol-3-phosphate acyltransferase, mitochondrial(GPAM)                  |
| UBC      | ubiquitin C(UBC)                                                           |
| SAMM50   | SAMM50 sorting and assembly machinery component(SAMM50)                    |
| ATP1B3   | ATPase Na <sup>+</sup> /K <sup>+</sup> transporting subunit beta 3(ATP1B3) |
| SDHB     | succinate dehydrogenase complex iron sulfur subunit B(SDHB)                |
| BCL2L13  | BCL2 like 13(BCL2L13)                                                      |
| ACADL    | acyl-CoA dehydrogenase, long chain(ACADL)                                  |
| LAMA4    | laminin subunit alpha 4(LAMA4)                                             |
| GPD2     | glycerol-3-phosphate dehydrogenase 2(GPD2)                                 |
| SCP2     | sterol carrier protein 2(SCP2)                                             |
| TALDO1   | transaldolase 1(TALDO1)                                                    |
| SSPN     | sarcospan(SSPN)                                                            |
| FABP4    | fatty acid binding protein 4(FABP4)                                        |
| ADIPOQ   | adiponectin, C1Q and collagen domain containing(ADIPOQ)                    |
| QDPR     | quinoid dihydropteridine reductase(QDPR)                                   |
| ACOX1    | acyl-CoA oxidase 1(ACOX1)                                                  |
| OMD      | osteomodulin(OMD)                                                          |
| GHITM    | growth hormone inducible transmembrane protein(GHITM)                      |
| REEP5    | receptor accessory protein 5(REEP5)                                        |
| DECR1    | 2,4-dienoyl-CoA reductase 1, mitochondrial(DECR1)                          |
| CD151    | CD151 molecule (Raph blood group)(CD151)                                   |
| CYP4B1   | cytochrome P450 family 4 subfamily B member 1(CYP4B1)                      |
| PHYH     | phytanoyl-CoA 2-hydroxylase(PHYH)                                          |
| PPP1R15B | protein phosphatase 1 regulatory subunit 15B(PPP1R15B)                     |

**Supplementary Table S5. List of interferon-gamma network genes up-regulated in subcutaneous fat of OSA subjects (Study Group 1). Highly connected nodes (e.g., hubs) are in bold.**

| <b>Gene Symbol</b> | <b>Gene Name</b>                                            | <b>Location</b>            | <b>Family</b>                 |
|--------------------|-------------------------------------------------------------|----------------------------|-------------------------------|
| APOL6              | apolipoprotein L6                                           | Extracellular Space        | transporter                   |
| ARL4A              | ADP ribosylation factor like GTPase 4A                      | Nucleus                    | enzyme                        |
| BANK1              | B cell scaffold protein with ankyrin repeats 1              | Extracellular Space        | other                         |
| BTG1               | BTG anti-proliferation factor 1                             | Nucleus                    | transcription regulator       |
| C1S                | complement C1s                                              | Extracellular Space        | peptidase                     |
| CAMK2D             | calcium/calmodulin dependent protein kinase II delta        | Cytoplasm                  | kinase                        |
| CASP1              | caspase 1                                                   | Cytoplasm                  | peptidase                     |
| <b>CASP3</b>       | <b>caspase 3</b>                                            | <b>Cytoplasm</b>           | <b>peptidase</b>              |
| CASP4              | caspase 4                                                   | Cytoplasm                  | peptidase                     |
| <b>CASP8</b>       | <b>caspase 8</b>                                            | <b>Nucleus</b>             | <b>peptidase</b>              |
| CCL2               | C-C motif chemokine ligand 2                                | Extracellular Space        | cytokine                      |
| CCL5               | C-C motif chemokine ligand 5                                | Extracellular Space        | cytokine                      |
| CD44               | CD44 molecule (Indian blood group)                          | Plasma Membrane            | other                         |
| CD69               | CD69 molecule                                               | Plasma Membrane            | transmembrane receptor        |
| CFH                | complement factor H                                         | Extracellular Space        | other                         |
| CXCL10             | C-X-C motif chemokine ligand 10                             | Extracellular Space        | cytokine                      |
| CXCL11             | C-X-C motif chemokine ligand 11                             | Extracellular Space        | cytokine                      |
| CXCL9              | C-X-C motif chemokine ligand 9                              | Extracellular Space        | cytokine                      |
| DDX58              | DEXD/H-box helicase 58                                      | Cytoplasm                  | enzyme                        |
| DDX60              | DEXD/H-box helicase 60                                      | Cytoplasm                  | enzyme                        |
| EIF2AK2            | eukaryotic translation initiation factor 2 alpha kinase 2   | Cytoplasm                  | kinase                        |
| <b>FAS</b>         | <b>Fas cell surface death receptor</b>                      | <b>Plasma Membrane</b>     | <b>transmembrane receptor</b> |
| FCGR1A             | Fc fragment of IgG receptor Ia                              | Plasma Membrane            | transmembrane receptor        |
| FGL2               | fibrinogen like 2                                           | Extracellular Space        | peptidase                     |
| GBP1               | guanylate binding protein 1                                 | Cytoplasm                  | enzyme                        |
| GBP2               | guanylate binding protein 2                                 | Cytoplasm                  | enzyme                        |
| GBP4               | guanylate binding protein 4                                 | Cytoplasm                  | enzyme                        |
| GBP5               | guanylate binding protein 5                                 | Plasma Membrane            | enzyme                        |
| GBP7               | guanylate binding protein 7                                 | Cytoplasm                  | enzyme                        |
| GCH1               | GTP cyclohydrolase 1                                        | Cytoplasm                  | enzyme                        |
| GZMA               | granzyme A                                                  | Cytoplasm                  | peptidase                     |
| HIF1A              | hypoxia inducible factor 1 subunit alpha                    | Nucleus                    | transcription regulator       |
| HLA-B              | major histocompatibility complex, class I, B                | Plasma Membrane            | transmembrane receptor        |
| HLA-C              | major histocompatibility complex, class I, C                | Plasma Membrane            | other                         |
| HLA-DMA            | major histocompatibility complex, class II, DM alpha        | Plasma Membrane            | transmembrane receptor        |
| HLA-DQA1           | major histocompatibility complex, class II, DQ alpha 1      | Plasma Membrane            | transmembrane receptor        |
| HLA-DQA2           | major histocompatibility complex, class II, DQ alpha 2      | Plasma Membrane            | transmembrane receptor        |
| HLA-DRB1           | major histocompatibility complex, class II, DR beta 1       | Plasma Membrane            | transmembrane receptor        |
| HLA-DRB5           | major histocompatibility complex, class II, DR beta 5       | Plasma Membrane            | transmembrane receptor        |
| HLA-G              | major histocompatibility complex, class I, G                | Plasma Membrane            | other                         |
| IDO1               | indoleamine 2,3-dioxygenase 1                               | Cytoplasm                  | enzyme                        |
| IFI44              | interferon induced protein 44                               | Cytoplasm                  | other                         |
| IFI44L             | interferon induced protein 44 like                          | Nucleus                    | other                         |
| IFIH1              | interferon induced with helicase C domain 1                 | Nucleus                    | enzyme                        |
| IFIT1              | interferon induced protein with tetratricopeptide repeats 1 | Cytoplasm                  | other                         |
| IFIT2              | interferon induced protein with tetratricopeptide repeats 2 | Cytoplasm                  | other                         |
| IFIT3              | interferon induced protein with tetratricopeptide repeats 3 | Cytoplasm                  | other                         |
| IFNAR2             | interferon alpha and beta receptor subunit 2                | Plasma Membrane            | transmembrane receptor        |
| <b>IFNG</b>        | <b>interferon gamma</b>                                     | <b>Extracellular Space</b> | <b>cytokine</b>               |
| IFNGR1             | interferon gamma receptor 1                                 | Plasma Membrane            | transmembrane receptor        |
| IRF4               | interferon regulatory factor 4                              | Nucleus                    | transcription regulator       |
| IRF8               | interferon regulatory factor 8                              | Nucleus                    | transcription regulator       |

|                |                                                                               |                            |                                |
|----------------|-------------------------------------------------------------------------------|----------------------------|--------------------------------|
| JAK1           | Janus kinase 1                                                                | Cytoplasm                  | kinase                         |
| JAK2           | Janus kinase 2                                                                | Cytoplasm                  | kinase                         |
| LATS2          | large tumor suppressor kinase 2                                               | Nucleus                    | kinase                         |
| LCP2           | lymphocyte cytosolic protein 2                                                | Cytoplasm                  | other                          |
| MX2            | MX dynamin like GTPase 2                                                      | Nucleus                    | enzyme                         |
| NAMPT          | nicotinamide phosphoribosyltransferase                                        | Extracellular Space        | cytokine                       |
| NCOA3          | nuclear receptor coactivator 3                                                | Nucleus                    | transcription regulator        |
| NFKB1          | nuclear factor kappa B subunit 1                                              | Nucleus                    | transcription regulator        |
| NMI            | N-myc and STAT interactor                                                     | Cytoplasm                  | transcription regulator        |
| NUP93          | nucleoporin 93                                                                | Nucleus                    | other                          |
| OAS2           | 2'-5'-oligoadenylate synthetase 2                                             | Cytoplasm                  | enzyme                         |
| PARP12         | poly(ADP-ribose) polymerase family member 12                                  | Nucleus                    | other                          |
| PIAS1          | protein inhibitor of activated STAT 1                                         | Nucleus                    | transcription regulator        |
| PLA2G4A        | phospholipase A2 group IVA                                                    | Cytoplasm                  | enzyme                         |
| PLSCR1         | phospholipid scramblase 1                                                     | Plasma Membrane            | enzyme                         |
| PML            | promyelocytic leukemia                                                        | Nucleus                    | transcription regulator        |
| PNP            | purine nucleoside phosphorylase                                               | Nucleus                    | enzyme                         |
| PNPT1          | polyribonucleotide nucleotidyltransferase 1                                   | Cytoplasm                  | enzyme                         |
| PSMA2          | proteasome subunit alpha 2                                                    | Cytoplasm                  | peptidase                      |
| PSMA3          | proteasome subunit alpha 3                                                    | Cytoplasm                  | peptidase                      |
| PSMB2          | proteasome subunit beta 2                                                     | Cytoplasm                  | peptidase                      |
| RIPK1          | receptor interacting serine/threonine kinase 1                                | Plasma Membrane            | kinase                         |
| RIPK2          | receptor interacting serine/threonine kinase 2                                | Plasma Membrane            | kinase                         |
| SAMD9L         | sterile alpha motif domain containing 9 like                                  | Extracellular Space        | other                          |
| SAMHD1         | SAM and HD domain containing deoxynucleoside triphosphate triphosphohydrolase | Nucleus                    | enzyme                         |
| SELP           | selectin P                                                                    | Plasma Membrane            | transmembrane receptor         |
| SERPING1       | serpin family G member 1                                                      | Extracellular Space        | other                          |
| SOD2           | superoxide dismutase 2                                                        | Cytoplasm                  | enzyme                         |
| SP100          | SP100 nuclear antigen                                                         | Nucleus                    | transcription regulator        |
| SP110          | SP110 nuclear body protein                                                    | Nucleus                    | transcription regulator        |
| SPPL2A         | signal peptide peptidase like 2A                                              | Plasma Membrane            | peptidase                      |
| SRI            | sorcini                                                                       | Cytoplasm                  | transporter                    |
| SSPN           | sarcospan                                                                     | Plasma Membrane            | other                          |
| ST8SIA4        | ST8 alpha-N-acetyl-neuraminide alpha-2,8-sialyltransferase 4                  | Cytoplasm                  | enzyme                         |
| <b>STAT1</b>   | <b>signal transducer and activator of transcription 1</b>                     | <b>Nucleus</b>             | <b>transcription regulator</b> |
| STAT2          | signal transducer and activator of transcription 2                            | Nucleus                    | transcription regulator        |
| <b>STAT3</b>   | <b>signal transducer and activator of transcription 3</b>                     | <b>Nucleus</b>             | <b>transcription regulator</b> |
| STAT4          | signal transducer and activator of transcription 4                            | Nucleus                    | transcription regulator        |
| SUMO1          | small ubiquitin-like modifier 1                                               | Nucleus                    | enzyme                         |
| <b>TNFSF10</b> | <b>TNF superfamily member 10</b>                                              | <b>Extracellular Space</b> | <b>cytokine</b>                |
| TRAFD1         | TRAF-type zinc finger domain containing 1                                     | Other                      | other                          |
| TRIM21         | tripartite motif containing 21                                                | Nucleus                    | enzyme                         |
| TRIM25         | tripartite motif containing 25                                                | Cytoplasm                  | transcription regulator        |
| VCAM1          | vascular cell adhesion molecule 1                                             | Plasma Membrane            | transmembrane receptor         |
| WARS           | tryptophanyl-tRNA synthetase                                                  | Cytoplasm                  | enzyme                         |
| XAF1           | XIAP associated factor 1                                                      | Nucleus                    | other                          |



**Supplementary Table S6. List of up-regulated gene sets (FDR < 0.05) in visceral fat of OSA subjects (Study Group 1).**

| <b>Gene Set Description</b>                                                         | <b>Number of Genes</b> | <b>FDR</b> |
|-------------------------------------------------------------------------------------|------------------------|------------|
| HALLMARK_PROTEIN_SECRETION                                                          | 96                     | >0.001     |
| HALLMARK_MYC_TARGETS_V1                                                             | 197                    | >0.001     |
| REACTOME_PROCESSING_OF_CAPPED_INTRON_CONTAINING_PRE_MRNA                            | 131                    | >0.001     |
| HALLMARK_INTERFERON_GAMMA_RESPONSE                                                  | 197                    | >0.001     |
| REACTOME_MRNA_PROCESSING                                                            | 149                    | >0.001     |
| REACTOME_HIV_INFECTION                                                              | 184                    | >0.001     |
| REACTOME_TRANSPORT_OF_MATURE_TRANSCRIPT_TO_CYTOPLASM                                | 50                     | >0.001     |
| REACTOME_HIV_LIFE_CYCLE                                                             | 105                    | >0.001     |
| KEGG_UBIQUITIN_MEDIATED_PROTEOLYSIS                                                 | 133                    | >0.001     |
| HALLMARK_UNFOLDED_PROTEIN_RESPONSE                                                  | 111                    | >0.001     |
| REACTOME_REGULATION_OF_MITOTIC_CELL_CYCLE                                           | 77                     | >0.001     |
| REACTOME_ASPARAGINE_N_LINKED_GLYCOSYLATION                                          | 79                     | >0.001     |
| REACTOME_HOST_INTERACTIONS_OF_HIV_FACTORS                                           | 118                    | >0.001     |
| KEGG_AMINOACYL_TRNA_BIOSYNTHESIS                                                    | 41                     | >0.001     |
| HALLMARK_MTORC1_SIGNALING                                                           | 197                    | >0.001     |
| REACTOME_MRNA_SPLICING                                                              | 104                    | >0.001     |
| REACTOME_SIGNALING_BY_WNT                                                           | 62                     | >0.001     |
| HALLMARK_INTERFERON_ALPHA_RESPONSE                                                  | 94                     | >0.001     |
| REACTOME_APC_C_CDC20_MEDIATED_DEGRADATION_OF_MITOTIC_PROTEINS                       | 65                     | >0.001     |
| REACTOME_ANTIGEN_PROCESSING_CROSS_PRESENTATION                                      | 71                     | >0.001     |
| REACTOME_INHIBITION_OF_THE_PROTEOLYTIC_ACTIVITY_OF_APC_C_REQUIRED_FOR_THE_ONSET_OF_ | 18                     | >0.001     |
| REACTOME_CLASS_I_MHC_MEDIATED_ANTIGEN_PROCESSING_PRESENTATION                       | 234                    | >0.001     |
| REACTOME_LATE_PHASE_OF_HIV_LIFE_CYCLE                                               | 92                     | >0.001     |
| REACTOME_CROSS_PRESENTATION_OF_SOLUBLE_EXOGENOUS_ANTIGENS_ENDOSOMES                 | 46                     | >0.001     |
| REACTOME_RNA_POL_II_TRANSCRIPTION                                                   | 94                     | >0.001     |
| REACTOME_TRANSPORT_OF_MATURE_MRNA_DERIVED_FROM_AN_INTRONLESS_TRANSCRIPT             | 30                     | >0.001     |
| REACTOME_TRNA_AMINOACYLATION                                                        | 42                     | >0.001     |
| REACTOME_CYTOSOLIC_TRNA_AMINOACYLATION                                              | 24                     | >0.001     |
| KEGG_RNA_DEGRADATION                                                                | 58                     | >0.001     |
| HALLMARK_EPITHELIAL_MESENCHYMAL_TRANSITION                                          | 197                    | >0.001     |
| REACTOME_APC_C_CDH1_MEDIATED_DEGRADATION_OF_CDC20_AND_OTHER_APC_C_CDH1_TARGETED_    | 64                     | >0.001     |
| REACTOME_AUTODEGRADATION_OF_CDH1_BY_CDH1_APC_C                                      | 56                     | >0.001     |
| REACTOME_TRANSCRIPTION                                                              | 189                    | >0.001     |
| KEGG_N_GLYCAN_BIOSYNTHESIS                                                          | 45                     | >0.001     |
| PID_ALK1_PATHWAY                                                                    | 26                     | >0.001     |
| REACTOME_GENERIC_TRANSCRIPTION_PATHWAY                                              | 334                    | >0.001     |
| PID_RANBP2_PATHWAY                                                                  | 11                     | >0.001     |
| KEGG_PROTEASOME                                                                     | 44                     | >0.001     |
| REACTOME_ANTIGEN_PRESENTATION_FOLDING_ASSEMBLY_AND_PEPTIDE_LOADING_OF_CLASS_I_MHC   | 20                     | >0.001     |
| PID_TRAIL_PATHWAY                                                                   | 28                     | >0.001     |
| REACTOME_MRNA_3_END_PROCESSING                                                      | 33                     | >0.001     |
| PID_CDC42_PATHWAY                                                                   | 70                     | >0.001     |
| KEGG_SPLICEOSOME                                                                    | 123                    | >0.001     |
| REACTOME_UNFOLDED_PROTEIN_RESPONSE                                                  | 73                     | >0.001     |
| HALLMARK_UV_RESPONSE_DN                                                             | 142                    | >0.001     |
| REACTOME_PHOSPHORYLATION_OF_THE_APC_C                                               | 17                     | >0.001     |
| REACTOME_MEMBRANE_TRAFFICKING                                                       | 122                    | >0.001     |
| REACTOME_ANTIVIRAL_MECHANISM_BY_IFN_STIMULATED_GENES                                | 63                     | >0.001     |
| REACTOME_CONVERSION_FROM_APC_C_CDC20_TO_APC_C_CDH1_IN_LATE_ANAPHASE                 | 16                     | >0.001     |
| PID_P53_REGULATION_PATHWAY                                                          | 58                     | >0.001     |
| REACTOME_METABOLISM_OF_NON_CODING_RNA                                               | 45                     | >0.001     |

|                                                                              |     |        |
|------------------------------------------------------------------------------|-----|--------|
| REACTOME_TRANSPORT_OF_RIBONUCLEOPROTEINS_INTO_THE_HOST_NUCLEUS               | 25  | >0.001 |
| BIOCARTA_ARAP_PATHWAY                                                        | 17  | >0.001 |
| REACTOME_AUTODEGRADATION_OF_THE_E3_UBIQUITIN_LIGASE_COP1                     | 47  | >0.001 |
| REACTOME_REGULATION_OF_ORNITHINE_DECARBOXYLASE_ODC                           | 48  | >0.001 |
| REACTOME_CELL_CYCLE_CHECKPOINTS                                              | 111 | >0.001 |
| BIOCARTA_FCER1_PATHWAY                                                       | 38  | >0.001 |
| HALLMARK_E2F_TARGETS                                                         | 199 | >0.001 |
| REACTOME_ANTIGEN_PROCESSING_UBIQUITINATION_PROTEASOME_DEGRADATION            | 198 | >0.001 |
| REACTOME_CLEAVAGE_OF_GROWING_TRANSCRIPT_IN_THE_TERMINATION_REGION_           | 42  | 0.002  |
| REACTOME_CELL_CYCLE_MITOTIC                                                  | 303 | 0.002  |
| BIOCARTA_RAB_PATHWAY                                                         | 12  | 0.002  |
| REACTOME_INTERFERON_GAMMA_SIGNALING                                          | 58  | 0.002  |
| REACTOME_SCF_BETA_TRCP_MEDIATED_DEGRADATION_OF_EM1                           | 49  | 0.002  |
| PID_RAC1_PATHWAY                                                             | 54  | 0.002  |
| PID_LYMPH_ANGIOGENESIS_PATHWAY                                               | 24  | 0.002  |
| PID_TGFBR_PATHWAY                                                            | 55  | 0.002  |
| REACTOME_TCR_SIGNALING                                                       | 50  | 0.002  |
| BIOCARTA_ACTINY_PATHWAY                                                      | 20  | 0.002  |
| REACTOME_TRANS_GOLGI_NETWORK_VESICLE_BUDDING                                 | 56  | 0.002  |
| REACTOME_NEP_NS2_INTERACTS_WITH_THE_CELLULAR_EXPORT_MACHINERY                | 25  | 0.002  |
| REACTOME_EARLY_PHASE_OF_HIV_LIFE_CYCLE                                       | 13  | 0.002  |
| REACTOME_REGULATION_OF_MRNA_STABILITY_BY_PROTEINS_THAT_BIND_AU_RICH_ELEMENTS | 80  | 0.003  |
| PID_BARD1_PATHWAY                                                            | 29  | 0.003  |
| REACTOME_ACTIVATION_OF_NF_KAPPAB_IN_B_CELLS                                  | 61  | 0.003  |
| REACTOME_CS_DS_DEGRADATION                                                   | 12  | 0.003  |
| REACTOME_P53_DEPENDENT_G1_DNA_DAMAGE_RESPONSE                                | 53  | 0.003  |
| REACTOME_ER_PHAGOSOME_PATHWAY                                                | 58  | 0.003  |
| REACTOME_G1_S_TRANSITION                                                     | 106 | 0.003  |
| ST_FAS_SIGNALING_PATHWAY                                                     | 63  | 0.003  |
| BIOCARTA_SALMONELLA_PATHWAY                                                  | 13  | 0.003  |
| KEGG_LYSOSOME                                                                | 118 | 0.003  |
| REACTOME_SYNTHESIS_OF_PIPS_AT_THE_EARLY_ENDOSOME_MEMBRANE                    | 12  | 0.003  |
| BIOCARTA_PROTEASOME_PATHWAY                                                  | 28  | 0.003  |
| PID_FAS_PATHWAY                                                              | 38  | 0.003  |
| REACTOME_ASSEMBLY_OF_THE_PRE_REPLICATIVE_COMPLEX                             | 63  | 0.003  |
| REACTOME_PROCESSING_OF_INTRONLESS_PRE_MRNAS                                  | 14  | 0.003  |
| REACTOME_COPI_MEDIATED_TRANSPORT                                             | 9   | 0.004  |
| REACTOME_DIABETES_PATHWAYS                                                   | 122 | 0.004  |
| REACTOME_INTERFERON_SIGNALING                                                | 147 | 0.004  |
| REACTOME_APC_CDC20_MEDIATED_DEGRADATION_OF_NEK2A                             | 21  | 0.004  |
| HALLMARK_PI3K_AKT_MTOR_SIGNALING                                             | 103 | 0.004  |
| REACTOME_GOLGI_ASSOCIATED_VESICLE_BIOGENESIS                                 | 49  | 0.004  |
| KEGG_PATHOGENIC_ESCHERICHIA_COLI_INFECTION                                   | 55  | 0.004  |
| REACTOME_INTEGRATION_OF_PROVIRUS                                             | 8   | 0.004  |
| HALLMARK_MITOTIC_SPINDLE                                                     | 198 | 0.004  |
| PID_ERBB1_DOWNSTREAM_PATHWAY                                                 | 105 | 0.004  |
| KEGG_TGF_BETA_SIGNALING_PATHWAY                                              | 84  | 0.004  |
| REACTOME_CELL_CYCLE                                                          | 391 | 0.004  |
| REACTOME_CDT1_ASSOCIATION_WITH_THE_CDC6_ORC_ORIGIN_COMPLEX                   | 54  | 0.004  |
| REACTOME_MAPK_TARGETS_NUCLEAR_EVENTS_MEDIATED_BY_MAP_KINASES                 | 30  | 0.004  |
| REACTOME_APC_C_CDC20_MEDIATED_DEGRADATION_OF_CYCLIN_B                        | 19  | 0.004  |
| REACTOME_MITOTIC_G1_G1_S_PHASES                                              | 130 | 0.004  |
| REACTOME_MITOTIC_M_M_G1_PHASES                                               | 164 | 0.004  |
| REACTOME_TOLL_RECEPTOR_CASCADES                                              | 109 | 0.004  |

|                                                                                    |     |       |
|------------------------------------------------------------------------------------|-----|-------|
| REACTOME_GENERATION_OF_SECOND_MESSENGER_MOLECULES                                  | 26  | 0.005 |
| REACTOME_CDK_MEDIATED_PHOSPHORYLATION_AND_REMOVAL_OF_CDC6                          | 46  | 0.005 |
| REACTOME_BIOSYNTHESIS_OF_THE_N_GLYCAN_PRECURSOR_DOLICHOL_LIPID_LINKED_OLIGOSACCHAF | 27  | 0.005 |
| REACTOME_METABOLISM_OF_RNA                                                         | 251 | 0.005 |
| REACTOME_MHC_CLASS_II_ANTIGEN_PRESENTATION                                         | 87  | 0.005 |
| REACTOME_ORC1_REMOVAL_FROM_CHROMATIN                                               | 65  | 0.006 |
| PID_FAK_PATHWAY                                                                    | 58  | 0.006 |
| REACTOME_TRANSCRIPTIONAL_ACTIVITY_OF_SMAD2_SMAD3_SMAD4_HETEROTRIMER                | 36  | 0.006 |
| REACTOME_P53_INDEPENDENT_G1_S_DNA_DAMAGE_CHECKPOINT                                | 48  | 0.007 |
| REACTOME_PROCESSING_OF_CAPPED_INTRONLESS_PRE_MRNA                                  | 23  | 0.007 |
| REACTOME_SIGNALING_BY_BMP                                                          | 22  | 0.007 |
| REACTOME_INTERACTIONS_OF_VPR_WITH_HOST_CELLULAR_PROTEINS                           | 30  | 0.007 |
| PID_PDGFRB_PATHWAY                                                                 | 127 | 0.007 |
| PID_IL8_CXCR2_PATHWAY                                                              | 33  | 0.007 |
| REACTOME_PERK_REGULATED_GENE_EXPRESSION                                            | 26  | 0.007 |
| REACTOME_VIF_MEDIATED_DEGRADATION_OF_APOBEC3G                                      | 49  | 0.007 |
| REACTOME_REGULATION_OF_APOPTOSIS                                                   | 56  | 0.007 |
| BIOCARTA_FAS_PATHWAY                                                               | 30  | 0.007 |
| KEGG_PROTEIN_EXPORT                                                                | 22  | 0.008 |
| REACTOME_MAP_KINASE_ACTIVATION_IN_TLR_CASCADE                                      | 49  | 0.008 |
| REACTOME_ACTIVATION_OF_CHAPERONE_GENES_BY_XBP1S                                    | 42  | 0.008 |
| PID_CXCR4_PATHWAY                                                                  | 101 | 0.008 |
| BIOCARTA_RHO_PATHWAY                                                               | 32  | 0.008 |
| PID_ANGIOPOIETIN_RECEPTOR_PATHWAY                                                  | 50  | 0.008 |
| REACTOME_APOPTOSIS                                                                 | 142 | 0.008 |
| REACTOME_SCFSKP2_MEDIATED_DEGRADATION_OF_P27_P21                                   | 53  | 0.008 |
| REACTOME_CYCLIN_E_ASSOCIATED_EVENTS_DURING_G1_S_TRANSITION_                        | 62  | 0.008 |
| REACTOME_SIGNALING_BY_TGF_BETA_RECEPTOR_COMPLEX                                    | 60  | 0.008 |
| REACTOME_REGULATION_OF_GLUCOKINASE_BY_GLUCOKINASE_REGULATORY_PROTEIN               | 25  | 0.008 |
| REACTOME_ACTIVATED_TLR4_SIGNALLING                                                 | 89  | 0.009 |
| BIOCARTA_TCR_PATHWAY                                                               | 44  | 0.009 |
| REACTOME_SMAD2_SMAD3_SMAD4_HETEROTRIMER_REGULATES_TRANSCRIPTION                    | 25  | 0.009 |
| REACTOME_PROTEIN_FOLDING                                                           | 50  | 0.009 |
| REACTOME_RNA_POL_II_PRE_TRANSCRIPTION_EVENTS                                       | 52  | 0.010 |
| BIOCARTA_CDC42RAC_PATHWAY                                                          | 16  | 0.010 |
| PID_FANCONI_PATHWAY                                                                | 44  | 0.010 |
| REACTOME_DESTABILIZATION_OF_MRNA_BY_AUF1_HNRNP_D0                                  | 50  | 0.010 |
| REACTOME_ACTIVATION_OF_CHAPERONES_BY_ATF6_ALPHA                                    | 11  | 0.011 |
| REACTOME_PD1_SIGNALING                                                             | 17  | 0.011 |
| REACTOME_DOWNSTREAM_TCR_SIGNALING                                                  | 33  | 0.011 |
| REACTOME_METAL_ION_SLC_TRANSPORTERS                                                | 22  | 0.011 |
| REACTOME_CALNEXIN_CALRETICULIN_CYCLE                                               | 11  | 0.011 |
| REACTOME_DEADENYLATION_DEPENDENT_MRNA_DECAY                                        | 43  | 0.012 |
| HALLMARK_COMPLEMENT                                                                | 195 | 0.012 |
| PID_DNA_PK_PATHWAY                                                                 | 16  | 0.012 |
| KEGG_LEISHMANIA_INFECTION                                                          | 68  | 0.012 |
| REACTOME_NFKB_AND_MAP_KINASES_ACTIVATION_MEDIATED_BY_TLR4_SIGNALING_REPERTOIRE     | 69  | 0.012 |
| REACTOME_N_GLYCAN_TRIMMING_IN_THE_ER_AND_CALNEXIN_CALRETICULIN_CYCLE               | 13  | 0.012 |
| REACTOME_LOSS_OF_NLP_FROM_MITOTIC_CENTROSOMES                                      | 55  | 0.012 |
| HALLMARK_ANDROGEN_RESPONSE                                                         | 99  | 0.012 |
| REACTOME_SYNTHESIS_AND_INTERCONVERSION_OF_NUCLEOTIDE_DI_AND_TRIPHOSPHATES          | 16  | 0.012 |
| BIOCARTA_MAPK_PATHWAY                                                              | 86  | 0.012 |
| REACTOME_SIGNALING_BY_THE_B_CELL_RECEPTOR_BCR                                      | 121 | 0.012 |
| KEGG_CELL_CYCLE                                                                    | 123 | 0.013 |

|                                                                                    |     |       |
|------------------------------------------------------------------------------------|-----|-------|
| PID_FCER1_PATHWAY                                                                  | 61  | 0.013 |
| REACTOME_PI_METABOLISM                                                             | 47  | 0.013 |
| REACTOME_TRANSLOCATION_OF_ZAP_70_TO_IMMUNOLOGICAL_SYNAPSE                          | 13  | 0.013 |
| HALLMARK_TGF_BETA_SIGNALING                                                        | 54  | 0.014 |
| BIOCARTA_EIF2_PATHWAY                                                              | 11  | 0.014 |
| REACTOME_ACTIVATION_OF_THE_AP1_FAMILY_OF_TRANSCRIPTION_FACTORS                     | 10  | 0.014 |
| KEGG_FC_GAMMA_R_MEDIATED_PHAGOCYTOSIS                                              | 89  | 0.014 |
| REACTOME_ACTIVATION_OF_GENES_BY_ATF4                                               | 23  | 0.014 |
| REACTOME_M_G1_TRANSITION                                                           | 78  | 0.015 |
| REACTOME_DNA_REPLICATION                                                           | 184 | 0.015 |
| REACTOME_RECRUITMENT_OF_MITOTIC_CENTROSOME_PROTEINS_AND_COMPLEXES                  | 62  | 0.015 |
| PID_SYNDECAN_4_PATHWAY                                                             | 31  | 0.015 |
| PID_P38_ALPHA_BETA_PATHWAY                                                         | 31  | 0.015 |
| HALLMARK_APICAL_JUNCTION                                                           | 198 | 0.015 |
| BIOCARTA_NDKDYNAMIN_PATHWAY                                                        | 17  | 0.015 |
| REACTOME_MITOTIC_G2_G2_M_PHASES                                                    | 77  | 0.015 |
| REACTOME_MYD88_MAL_CASCADE_INITIATED_ON_PLASMA_MEMBRANE                            | 80  | 0.015 |
| BIOCARTA_MEF2D_PATHWAY                                                             | 18  | 0.016 |
| REACTOME_PECAM1_INTERACTIONS                                                       | 9   | 0.016 |
| REACTOME_RNA_POL_I_RNA_POL_III_AND_MITOCHONDRIAL_TRANSCRIPTION                     | 109 | 0.016 |
| PID_HEDGEHOG_GLI_PATHWAY                                                           | 48  | 0.016 |
| REACTOME_SMOOTH_MUSCLE_CONTRACTION                                                 | 23  | 0.016 |
| REACTOME_MITOTIC_PROMETAPHASE                                                      | 82  | 0.016 |
| BIOCARTA_RAC1_PATHWAY                                                              | 23  | 0.016 |
| PID_NFAT_3PATHWAY                                                                  | 53  | 0.016 |
| PID_ALK2_PATHWAY                                                                   | 11  | 0.017 |
| REACTOME_TRIF_MEDIATED_TLR3_SIGNALING                                              | 72  | 0.018 |
| PID_ATM_PATHWAY                                                                    | 34  | 0.018 |
| BIOCARTA_PDGF_PATHWAY                                                              | 32  | 0.019 |
| REACTOME_TGF_BETA_RECEPTOR_SIGNALING_ACTIVATES_SMADS                               | 24  | 0.019 |
| PID_WNT_CANONICAL_PATHWAY                                                          | 20  | 0.019 |
| REACTOME_TRAF6_MEDIATED_INDUCION_OF_NFKB_AND_MAP_KINASES_UPON_TLR7_8_OR_9_ACTIVATI | 74  | 0.019 |
| REACTOME_ACTIVATION_OF_CHAPERONE_GENES_BY_ATF6_ALPHA                               | 9   | 0.020 |
| PID_AVB3_OPN_PATHWAY                                                               | 31  | 0.021 |
| REACTOME_DARPP_32_EVENTS                                                           | 24  | 0.021 |
| PID_NFKAPPAB_CANONICAL_PATHWAY                                                     | 23  | 0.021 |
| PID_TCR_PATHWAY                                                                    | 66  | 0.021 |
| BIOCARTA_HCMV_PATHWAY                                                              | 17  | 0.021 |
| REACTOME_REGULATION_OF_IFNG_SIGNALING                                              | 13  | 0.022 |
| REACTOME_METABOLISM_OF_MRNA                                                        | 209 | 0.022 |
| HALLMARK_KRAS_SIGNALING_UP                                                         | 193 | 0.022 |
| REACTOME_DOWNSTREAM_SIGNALING_EVENTS_OF_B_CELL_RECEPTOR_BCR                        | 92  | 0.022 |
| BIOCARTA_CERAMIDE_PATHWAY                                                          | 22  | 0.022 |
| REACTOME_DEADENYLATION_OF_MRNA                                                     | 18  | 0.022 |
| PID_SMAD2_3PATHWAY                                                                 | 17  | 0.022 |
| REACTOME_FORMATION_OF_RNA_POL_II_ELONGATION_COMPLEX_                               | 37  | 0.023 |
| REACTOME_RNA_POL_I_TRANSCRIPTION_INITIATION                                        | 22  | 0.023 |
| REACTOME_SYNTHESIS_OF_PIPS_AT_THE_LATE_ENDOSOME_MEMBRANE                           | 10  | 0.023 |
| REACTOME_APOBEC3G_MEDIATED_RESISTANCE_TO_HIV1_INFECTION                            | 5   | 0.023 |
| BIOCARTA_HIVNEF_PATHWAY                                                            | 57  | 0.024 |
| PID_AVB3_INTEGRIN_PATHWAY                                                          | 74  | 0.024 |
| BIOCARTA_TGFB_PATHWAY                                                              | 19  | 0.024 |
| BIOCARTA_STRESS_PATHWAY                                                            | 25  | 0.025 |
| BIOCARTA_ATRBRCA_PATHWAY                                                           | 20  | 0.025 |

|                                                                                     |     |       |
|-------------------------------------------------------------------------------------|-----|-------|
| KEGG_COLORECTAL_CANCER                                                              | 62  | 0.025 |
| PID_AR_PATHWAY                                                                      | 60  | 0.026 |
| PID_CDC42_REG_PATHWAY                                                               | 29  | 0.026 |
| BIOCARTA_EPHA4_PATHWAY                                                              | 9   | 0.026 |
| BIOCARTA_TNFR1_PATHWAY                                                              | 29  | 0.027 |
| REACTOME_CYTOKINE_SIGNALING_IN_IMMUNE_SYSTEM                                        | 256 | 0.027 |
| REACTOME_RNA_POL_II_TRANSCRIPTION_PRE_INITIATION_AND_PROMOTER_OPENING               | 37  | 0.027 |
| REACTOME_RNA_POL_I_TRANSCRIPTION                                                    | 77  | 0.027 |
| PID_VEGFR1_2_PATHWAY                                                                | 67  | 0.028 |
| REACTOME_PHOSPHORYLATION_OF_CD3_AND_TCR_ZETA_CHAINS                                 | 15  | 0.028 |
| ST_JNK_MAPK_PATHWAY                                                                 | 40  | 0.028 |
| KEGG_NON_HOMOLOGOUS_END_JOINING                                                     | 13  | 0.030 |
| REACTOME_METABOLISM_OF_PROTEINS                                                     | 415 | 0.030 |
| REACTOME_IKK_COMPLEX_RECRUITMENT_MEDIATED_BY_RIP1                                   | 9   | 0.030 |
| REACTOME_FORMATION_OF_TUBULIN_FOLDING_INTERMEDIATES_BY_CCT_TRIC                     | 20  | 0.030 |
| REACTOME_TIE2_SIGNALING                                                             | 17  | 0.031 |
| REACTOME_KERATAN_SULFATE_DEGRADATION                                                | 11  | 0.031 |
| HALLMARK_G2M_CHECKPOINT                                                             | 199 | 0.033 |
| REACTOME_POST_CHAPERONIN_TUBULIN_FOLDING_PATHWAY                                    | 17  | 0.033 |
| BIOCARTA_TCRA_PATHWAY                                                               | 11  | 0.033 |
| REACTOME_ERK_MAPK_TARGETS                                                           | 21  | 0.035 |
| KEGG_APOPTOSIS                                                                      | 86  | 0.036 |
| REACTOME_DOWNREGULATION_OF_TGF_BETA_RECEPTOR_SIGNALING                              | 21  | 0.036 |
| REACTOME_SYNTHESIS_OF_DNA                                                           | 90  | 0.036 |
| REACTOME_INSULIN_SYNTHESIS_AND_PROCESSING                                           | 18  | 0.036 |
| PID_TOLL_ENDOGENOUS_PATHWAY                                                         | 25  | 0.036 |
| REACTOME_SIGNALING_BY_NOTCH1                                                        | 67  | 0.037 |
| PID_MAPK_TRK_PATHWAY                                                                | 34  | 0.038 |
| PID_INTEGRIN5_PATHWAY                                                               | 17  | 0.039 |
| REACTOME_SEMA3A_PAK_DEPENDENT_AXON_REPULSION                                        | 14  | 0.039 |
| BIOCARTA_THELPER_PATHWAY                                                            | 12  | 0.039 |
| REACTOME_NUCLEAR_EVENTS_KINASE_AND_TRANSCRIPTION_FACTOR_ACTIVATION                  | 24  | 0.039 |
| KEGG_OTHER_GLYCAN_DEGRADATION                                                       | 16  | 0.039 |
| PID_NFKAPPAB_ATYPICAL_PATHWAY                                                       | 17  | 0.039 |
| REACTOME_S_PHASE                                                                    | 106 | 0.039 |
| PID_MYC_PATHWAY                                                                     | 24  | 0.039 |
| REACTOME_COLLAGEN_FORMATION                                                         | 54  | 0.040 |
| REACTOME_NOD1_2_SIGNALING_PATHWAY                                                   | 28  | 0.040 |
| BIOCARTA_MET_PATHWAY                                                                | 36  | 0.041 |
| REACTOME_DNA_REPAIR                                                                 | 101 | 0.041 |
| BIOCARTA_41BB_PATHWAY                                                               | 16  | 0.041 |
| BIOCARTA_RNA_PATHWAY                                                                | 10  | 0.042 |
| KEGG_ENDOCYTOSIS                                                                    | 176 | 0.042 |
| REACTOME_RESPONSE_TO_ELEVATED_PLATELET_CYTOSOLIC_CA2_                               | 79  | 0.042 |
| REACTOME_REGULATION_OF_KIT_SIGNALING                                                | 16  | 0.043 |
| PID_EPHB_FWD_PATHWAY                                                                | 40  | 0.044 |
| PID_RHOA_PATHWAY                                                                    | 45  | 0.044 |
| REACTOME_CELL_EXTRACELLULAR_MATRIX_INTERACTIONS                                     | 14  | 0.044 |
| BIOCARTA_D4GDI_PATHWAY                                                              | 13  | 0.044 |
| REACTOME_MRNA_CAPPING                                                               | 27  | 0.044 |
| PID_INTEGRIN1_PATHWAY                                                               | 65  | 0.044 |
| REACTOME_E2F_MEDIATED_REGULATION_OF_DNA_REPLICATION                                 | 33  | 0.045 |
| REACTOME_JNK_C_JUN_KINASES_PHOSPHORYLATION_AND_ACTIVATION_MEDIATED_BY_ACTIVATED_HUI | 16  | 0.045 |
| KEGG_CHRONIC_MYELOID_LEUKEMIA                                                       | 73  | 0.045 |

|                                                                                    |     |       |
|------------------------------------------------------------------------------------|-----|-------|
| REACTOME_POST_TRANSLATIONAL_PROTEIN_MODIFICATION                                   | 177 | 0.045 |
| BIOCARTA_BCR_PATHWAY                                                               | 34  | 0.045 |
| KEGG_NOD_LIKE_RECEPTOR_SIGNALING_PATHWAY                                           | 60  | 0.045 |
| REACTOME_NUCLEOTIDE_BINDING_DOMAIN_LEUCINE_RICH_REPEAT_CONTAINING_RECEPTOR_NLR_SIG | 43  | 0.045 |
| BIOCARTA_LEPTIN_PATHWAY                                                            | 10  | 0.045 |
| PID_ARF_3PATHWAY                                                                   | 19  | 0.045 |
| PID_ERBB2_ERBB3_PATHWAY                                                            | 44  | 0.045 |
| PID_ILK_PATHWAY                                                                    | 45  | 0.046 |
| BIOCARTA_RANKL_PATHWAY                                                             | 14  | 0.046 |
| REACTOME_RNA_POL_III_TRANSCRIPTION                                                 | 33  | 0.047 |
| REACTOME_POST_TRANSLATIONAL_MODIFICATION_SYNTHESIS_OF_GPI_ANCHORED_PROTEINS        | 26  | 0.048 |
| KEGG_VASOPRESSIN_REGULATED_WATER_REABSORPTION                                      | 44  | 0.048 |
| REACTOME_NOTCH1_INTRACELLULAR_DOMAIN_REGULATES_TRANSCRIPTION                       | 44  | 0.048 |
| KEGG_BASAL_TRANSCRIPTION_FACTORS                                                   | 32  | 0.048 |
| REACTOME_LYSOSOME_VESICLE_BIOGENESIS                                               | 22  | 0.049 |
| REACTOME_DOUBLE_STRAND_BREAK_REPAIR                                                | 22  | 0.049 |
| REACTOME_MYOGENESIS                                                                | 26  | 0.049 |
| PID_INTEGRIN3_PATHWAY                                                              | 42  | 0.050 |

**Supplementary Table S7. List of down-regulated gene sets (FDR < 0.05) in visceral fat of OSA subjects (Study Group 1).**

| <b>Gene Set Description</b>                         | <b>Number of Genes</b> | <b>FDR</b> |
|-----------------------------------------------------|------------------------|------------|
| REACTOME_OLFACTORY_SIGNALING_PATHWAY                | 315                    | >0.001     |
| KEGG_OLFACTORY_TRANSDUCTION                         | 376                    | >0.001     |
| REACTOME_BETA_DEFENSINS                             | 34                     | >0.001     |
| REACTOME_DEFENSINS                                  | 41                     | >0.001     |
| KEGG_RETINOL_METABOLISM                             | 53                     | >0.001     |
| REACTOME_XENOBIOTICS                                | 15                     | >0.001     |
| KEGG_STEROID_HORMONE_BIOSYNTHESIS                   | 45                     | >0.001     |
| KEGG_METABOLISM_OF_XENOBIOTICS_BY_CYTOCHROME_P450   | 60                     | 0.001      |
| KEGG_DRUG_METABOLISM_CYTOCHROME_P450                | 62                     | 0.003      |
| KEGG_LINOLEIC_ACID_METABOLISM                       | 27                     | 0.005      |
| REACTOME_LIGAND_GATED_ION_CHANNEL_TRANSPORT         | 21                     | 0.007      |
| PID_CONE_PATHWAY                                    | 23                     | 0.008      |
| REACTOME_GABA_A_RECEPTOR_ACTIVATION                 | 12                     | 0.009      |
| BIOCARTA_CYTOKINE_PATHWAY                           | 19                     | 0.014      |
| REACTOME_REGULATION_OF_IFNA_SIGNALING               | 21                     | 0.014      |
| REACTOME_RECYCLING_OF_BILE_ACIDS_AND_SALTS          | 11                     | 0.015      |
| REACTOME_HORMONE_LIGAND_BINDING_RECEPTORS           | 10                     | 0.016      |
| REACTOME_CYTOCHROME_P450_ARRANGED_BY_SUBSTRATE_TYPE | 50                     | 0.017      |
| REACTOME_ORGANIC_CATION_ANION_ZWITTERION_TRANSPORT  | 13                     | 0.019      |
| REACTOME_CLASS_A1_RHODOPSIN_LIKE_RECEPTORS          | 280                    | 0.019      |
| KEGG_PPAR_SIGNALING_PATHWAY                         | 68                     | 0.021      |
| KEGG_STARCH_AND_SUCROSE_METABOLISM                  | 41                     | 0.024      |
| REACTOME_STRIATED_MUSCLE_CONTRACTION                | 27                     | 0.028      |
| PID_RHODOPSIN_PATHWAY                               | 24                     | 0.029      |
| REACTOME_BIOLOGICAL_OXIDATIONS                      | 126                    | 0.029      |
| HALLMARK_KRAS_SIGNALING_DN                          | 192                    | 0.029      |
| KEGG_NEUROACTIVE_LIGAND_RECEPTOR_INTERACTION        | 265                    | 0.040      |
| NABA_SECRETED_FACTORS                               | 328                    | 0.041      |
| KEGG_CYTOKINE_CYTOKINE_RECEPTOR_INTERACTION         | 247                    | 0.041      |
| REACTOME_POTASSIUM_CHANNELS                         | 97                     | 0.044      |
| REACTOME_INTERACTION_BETWEEN_L1_AND_ANKYRINS        | 21                     | 0.045      |
| REACTOME_BILE_ACID_AND_BILE_SALT_METABOLISM         | 27                     | 0.046      |

**Supplementary Table S8. List of up-regulated gene sets (FDR < 0.05) in subcutaneous fat of OSA subjects after CPAP therapy (Study Group 2).**

| Gene Set Description                                               | Number of Genes | FDR    |
|--------------------------------------------------------------------|-----------------|--------|
| HALLMARK_MYC_TARGETS_V2                                            | 56              | >0.001 |
| HALLMARK_TNFA_SIGNALING_VIA_NFKB                                   | 197             | >0.001 |
| REACTOME_CHOLESTEROL_BIOSYNTHESIS                                  | 21              | >0.001 |
| KEGG_STEROID_BIOSYNTHESIS                                          | 16              | >0.001 |
| HALLMARK_MYC_TARGETS_V1                                            | 197             | >0.001 |
| REACTOME_MRNA_SPLICING                                             | 104             | >0.001 |
| REACTOME_MRNA_PROCESSING                                           | 149             | >0.001 |
| PID_AP1_PATHWAY                                                    | 68              | >0.001 |
| REACTOME_PROCESSING_OF_CAPPED_INTRON_CONTAINING_PRE_MRNA           | 131             | 0.001  |
| REACTOME_MRNA_SPLICING_MINOR_PATHWAY                               | 40              | 0.002  |
| REACTOME_RNA_POL_II_TRANSCRIPTION                                  | 94              | 0.003  |
| BIOCARTA_CARDIACEGF_PATHWAY                                        | 18              | 0.004  |
| KEGG_SPLICEOSOME                                                   | 123             | 0.004  |
| REACTOME_TRNA_AMINOACYLATION                                       | 42              | 0.006  |
| HALLMARK_E2F_TARGETS                                               | 199             | 0.006  |
| KEGG_STEROID_HORMONE_BIOSYNTHESIS                                  | 45              | 0.007  |
| PID_P38_ALPHA_BETA_DOWNSTREAM_PATHWAY                              | 38              | 0.007  |
| KEGG_TERPENOID_BACKBONE_BIOSYNTHESIS                               | 15              | 0.01   |
| REACTOME_UNFOLDED_PROTEIN_RESPONSE                                 | 73              | 0.011  |
| REACTOME_CLEAVAGE_OF_GROWING_TRANSCRIPT_IN_THE_TERMINATION_REGION_ | 42              | 0.012  |
| REACTOME_CYTOSOLIC_TRNA_AMINOACYLATION                             | 24              | 0.011  |
| REACTOME_CDT1_ASSOCIATION_WITH_THE_CDC6_ORC_ORIGIN_COMPLEX         | 54              | 0.012  |
| REACTOME_DESTABILIZATION_OF_MRNA_BY_AUF1_HNRNP_D0                  | 50              | 0.013  |
| REACTOME_ASSEMBLY_OF_THE_PRE_REPLICATIVE_COMPLEX                   | 63              | 0.013  |
| REACTOME_E2F_MEDIATED_REGULATION_OF_DNA_REPLICATION                | 33              | 0.014  |
| PID_S1P_S1P2_PATHWAY                                               | 24              | 0.014  |
| REACTOME_FORMATION_OF_RNA_POL_II_ELONGATION_COMPLEX_               | 37              | 0.013  |
| REACTOME_ORC1_REMOVAL_FROM_CHROMATIN                               | 65              | 0.015  |
| REACTOME_PROCESSING_OF_CAPPED_INTRONLESS_PRE_MRNA                  | 23              | 0.016  |
| PID_NFAT_TFPATHWAY                                                 | 45              | 0.016  |
| REACTOME_MITOTIC_G1_G1_S_PHASES                                    | 130             | 0.015  |
| PID_ATF2_PATHWAY                                                   | 56              | 0.016  |
| PID_MYC_ACTIV_PATHWAY                                              | 76              | 0.016  |
| REACTOME_CDK_MEDIATED_PHOSPHORYLATION_AND_REMOVAL_OF_CDC6          | 46              | 0.016  |
| KEGG_AMINOACYL_TRNA_BIOSYNTHESIS                                   | 41              | 0.018  |
| REACTOME_PERK_REGULATED_GENE_EXPRESSION                            | 26              | 0.018  |
| REACTOME_MITOCHONDRIAL_PROTEIN_IMPORT                              | 45              | 0.018  |
| BIOCARTA_CCR5_PATHWAY                                              | 17              | 0.02   |
| REACTOME_MITOTIC_M_M_G1_PHASES                                     | 164             | 0.02   |
| REACTOME_REGULATION_OF_ORNITHINE_DECARBOXYLASE_ODC                 | 48              | 0.02   |
| BIOCARTA_CDMAC_PATHWAY                                             | 16              | 0.023  |
| REACTOME_SIGNALING_BY_WNT                                          | 62              | 0.024  |
| HALLMARK_UNFOLDED_PROTEIN_RESPONSE                                 | 111             | 0.024  |
| REACTOME_SCF_BETA_TRCP_MEDIATED_DEGRADATION_OF_EMI1                | 49              | 0.026  |
| REACTOME_ACTIVATION_OF_CHAPERONE_GENES_BY_ATF6_ALPHA               | 9               | 0.027  |
| REACTOME_ACTIVATION_OF_NF_KAPPAB_IN_B_CELLS                        | 61              | 0.026  |
| REACTOME_ELONGATION_ARREST_AND_RECOVERY                            | 27              | 0.026  |
| KEGG_PROTEASOME                                                    | 44              | 0.026  |
| BIOCARTA_RANMS_PATHWAY                                             | 10              | 0.027  |
| REACTOME_DNA_REPLICATION                                           | 184             | 0.027  |
| REACTOME_HIV_INFECTION                                             | 184             | 0.031  |
| PID_CIRCADIAN_PATHWAY                                              | 16              | 0.032  |



|                                                                               |     |       |
|-------------------------------------------------------------------------------|-----|-------|
| REACTOME_HOST_INTERACTIONS_OF_HIV_FACTORS                                     | 118 | 0.032 |
| REACTOME_G0_AND_EARLY_G1                                                      | 23  | 0.034 |
| REACTOME_METABOLISM_OF_RNA                                                    | 251 | 0.035 |
| REACTOME_CELL_CYCLE_MITOTIC                                                   | 303 | 0.034 |
| REACTOME_METABOLISM_OF_STEROID_HORMONES_AND_VITAMINS_A_AND_D                  | 34  | 0.034 |
| REACTOME_METABOLISM_OF_NUCLEOTIDES                                            | 68  | 0.036 |
| REACTOME_G1_S_TRANSITION                                                      | 106 | 0.036 |
| REACTOME_P53_INDEPENDENT_G1_S_DNA_DAMAGE_CHECKPOINT                           | 48  | 0.036 |
| REACTOME_CDC6_ASSOCIATION_WITH_THE_ORC_ORIGIN_COMPLEX                         | 11  | 0.036 |
| HALLMARK_CHOLESTEROL_HOMEOSTASIS                                              | 73  | 0.037 |
| REACTOME_ACTIVATION_OF_CHAPERONES_BY_ATF6_ALPHA                               | 11  | 0.036 |
| KEGG_CIRCADIAN_RHYTHM_MAMMAL                                                  | 13  | 0.036 |
| REACTOME_MRNA_3_END_PROCESSING                                                | 33  | 0.036 |
| REACTOME_SCFSKP2_MEDIATED_DEGRADATION_OF_P27_P21                              | 53  | 0.036 |
| PID_REG_GR_PATHWAY                                                            | 79  | 0.036 |
| REACTOME_G1_S_SPECIFIC_TRANSCRIPTION                                          | 17  | 0.037 |
| REACTOME_M_G1_TRANSITION                                                      | 78  | 0.037 |
| BIOCARTA_DREAM_PATHWAY                                                        | 14  | 0.038 |
| PID_IL6_7_PATHWAY                                                             | 47  | 0.037 |
| REACTOME_SLBP_DEPENDENT_PROCESSING_OF_REPLICATION_DEPENDENT_HISTONE_PRE_MRNAS | 11  | 0.037 |
| REACTOME_CYCLIN_E_ASSOCIATED_EVENTS_DURING_G1_S_TRANSITION_                   | 62  | 0.037 |
| REACTOME_P2Y_RECEPTORS                                                        | 11  | 0.037 |
| REACTOME_RNA_POL_II_PRE_TRANSCRIPTION_EVENTS                                  | 52  | 0.037 |
| REACTOME_MAPK_TARGETS_NUCLEAR_EVENTS_MEDIATED_BY_MAP_KINASES                  | 30  | 0.037 |
| KEGG_TAURINE_AND_HYPOTAURINE_METABOLISM                                       | 10  | 0.037 |
| BIOCARTA_PROTEASOME_PATHWAY                                                   | 28  | 0.039 |
| REACTOME_MITOTIC_PROMETAPHASE                                                 | 82  | 0.039 |
| PID_TCR_CALCIIUM_PATHWAY                                                      | 27  | 0.041 |
| REACTOME_CROSS_PRESENTATION_OF_SOLUBLE_EXOGENOUS_ANTIGENS_ENDOSOMES           | 46  | 0.042 |
| REACTOME_ACTIVATION_OF_GENES_BY_ATF4                                          | 23  | 0.045 |
| REACTOME_VIF_MEDIATED_DEGRADATION_OF_APOBEC3G                                 | 49  | 0.047 |
| REACTOME_TRANSPORT_OF_MATURE_TRANSCRIPT_TO_CYTOPLASM                          | 50  | 0.047 |
| REACTOME_LATE_PHASE_OF_HIV_LIFE_CYCLE                                         | 92  | 0.048 |
| REACTOME_DEFENSINS                                                            | 41  | 0.048 |
| PID_AVB3_OPN_PATHWAY                                                          | 31  | 0.049 |
| REACTOME_S_PHASE                                                              | 106 | 0.049 |

**Supplementary Table S9. Cholesterol biosynthesis steps mediated by up-regulated genes in subcutaneous fat after CPAP therapy in OSA subjects (Study Group 2).**

1. ACAT2: condenses 2 Ac-CoA to form ACA-CoA
2. HMGCS1: condenses Ac-CoA and ACA-CoA to form bHMG-CoA
3. HMGCR: reduction of HMG-CoA produces mevalonate
4. MVK: mevalonate is phosphorylated to mevalonate-5-phosphate
5. MVD: decarboxylates MVA5PP to IPPP
6. IDL1/IDL2: isopentenyl pyrophosphate rearranges to dimethylallyl pyrophosphate
7. FDPS: addition of isopentenyl pyrophosphate to DMAPP
8. FDPS: another isopentenyl pyrophosphate is added to geranyl pyrophosphate
9. FDFT: two FPP molecules dimerize to form presqualene diphosphate
10. FDFT: reduction of presqualene diphosphate to form squalene
11. SQLE: squalene is oxidized to its epoxide
12. LSS: squalene 2,3-epoxide cyclizes, forming lanosterol
13. CYP51A1: demethylates LNSOL
14. TM7SF2: 4,4-dimethylcholesta-8(9),14,24-trien-3beta-ol is reduced to 4,4-dimethylcholesta-8(9),24-dien-3beta-ol
15. MSMO1: 4,4-dimethylcholesta-8(9),24-dien-3beta-ol is oxidized to 4-methyl,4-carboxycholesta-8(9),24-dien-3beta-ol
16. NSDHL: 4-methyl,4-carboxycholesta-8(9),24-dien-3beta-ol is decarboxylated and oxidized to form 4-methylcholesta-8(9),
17. HSD17B7: 4-methylcholesta-8(9),24-dien-3-one is reduced to 4-methylcholesta-8(9),24-dien-3beta-ol
18. MSMO1: 4-methylcholesta-8(9),24-dien-3beta-ol is oxidized to 4-carboxycholesta-8(9),24-dien-3beta-ol
19. NSDHL : 4-carboxycholesta-8(9),24-dien-3beta-ol is decarboxylated and oxidized to form cholesta-8(9),24-dien-3-one (zy
20. HSD17B7: zymosterone (cholesta-8(9),24-dien-3-one) is reduced to zymosterol (cholesta-8(9),24-dien-3beta-ol)
21. EBP: zymosterol is isomerized to cholesta-7,24-dien-3beta-ol
22. DHCR7: cholesta-5,7,24-trien-3beta-ol is reduced to desmosterol
23. EBP: isomerizes ZYMSTNL to LTHSOL
24. DHCR7: reduces 7-dehydroCHOL to CHOLESTEROL
